# Supplementary material
Source: MDPI journal article supplement (https://www.mdpi.com/2227-9717/10/11/2200)
Supplement: s1 [file s1]

Supporting Information

**Reaction of chloroacetyl-modified peptides with  
mercaptoundecahydrododecaborate (BSH) is accelerated by basic  
amino acid residues in the peptide**

Mizuki Kitamatsu, Ken Inoue, Naoki Yamagata and Hiroyuki Michiue

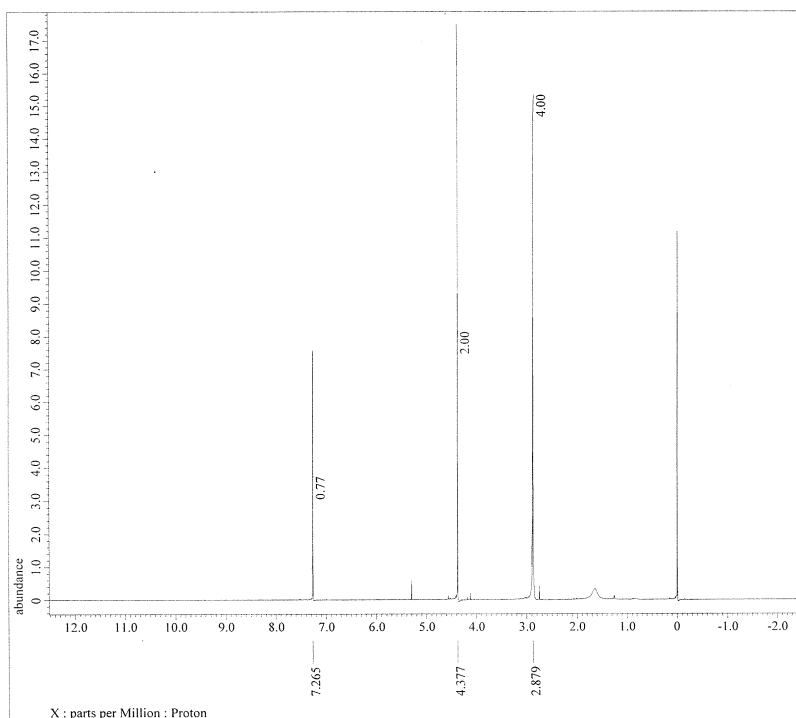

Figure S1.  $^1\text{H}$  NMR spectrum of ClAc-OSu in  $\text{CDCl}_3$  at room temperature. 400 MHz:  $\delta = 4.38$  (2H, s,  $\text{ClCH}_2$ ), 2.88 (4H, s,  $\text{CH}_2\text{CH}_2$ ).

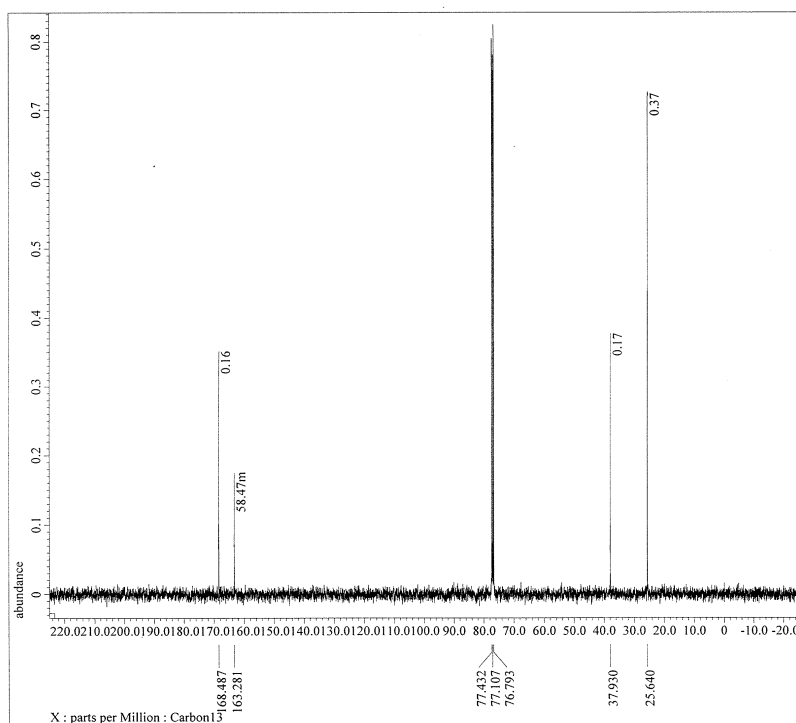

Figure S2.  $^{13}\text{C}$  NMR spectrum of ClAc-OSu in  $\text{CDCl}_3$  at room temperature. 400 MHz:  $\delta = 25.6$  ( $\text{CH}_2\text{CH}_2$ ), 37.9 ( $\text{CH}_2\text{Cl}$ ), 163.3 ( $\text{OC=O}$ ), 168.5 ( $\text{NC=O}$ ).

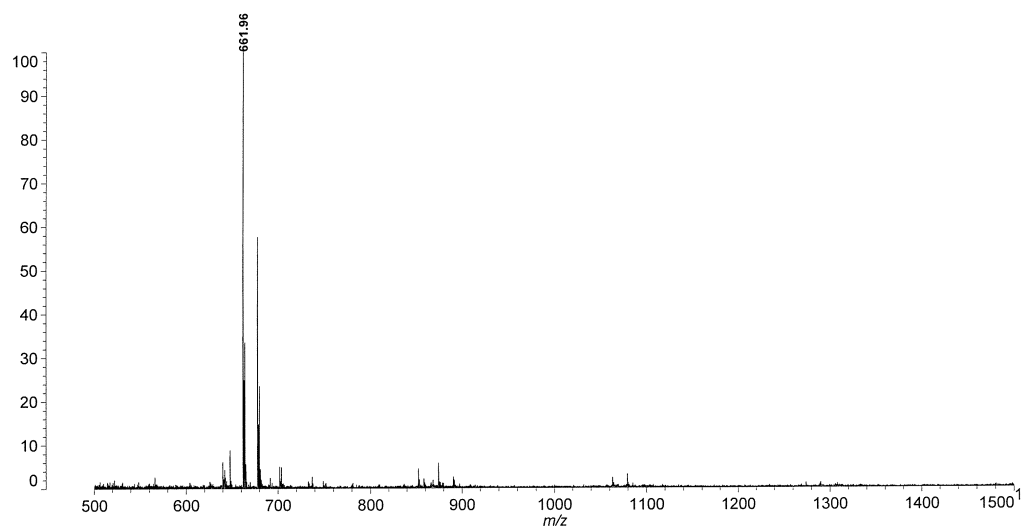

Figure S3. MALDI-TOF mass spectrum of **Cl-3A**.  $\alpha$ -CHCA was used as a matrix. **Cl-3A**: calcd.  $[M+Na]^+ = 664.28$  and obsd.  $[M+Na]^+ = 661.96$ .

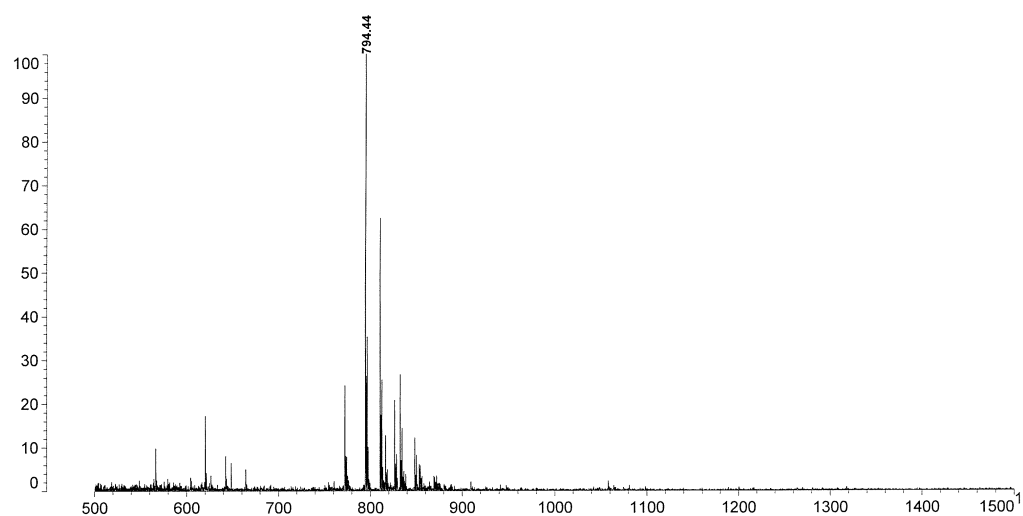

Figure S4. MALDI-TOF mass spectrum of **Cl-3D**.  $\alpha$ -CHCA was used as a matrix. **Cl-3D**: calcd.  $[M+Na]^+ = 796.26$  and obsd.  $[M+Na]^+ = 794.44$ .

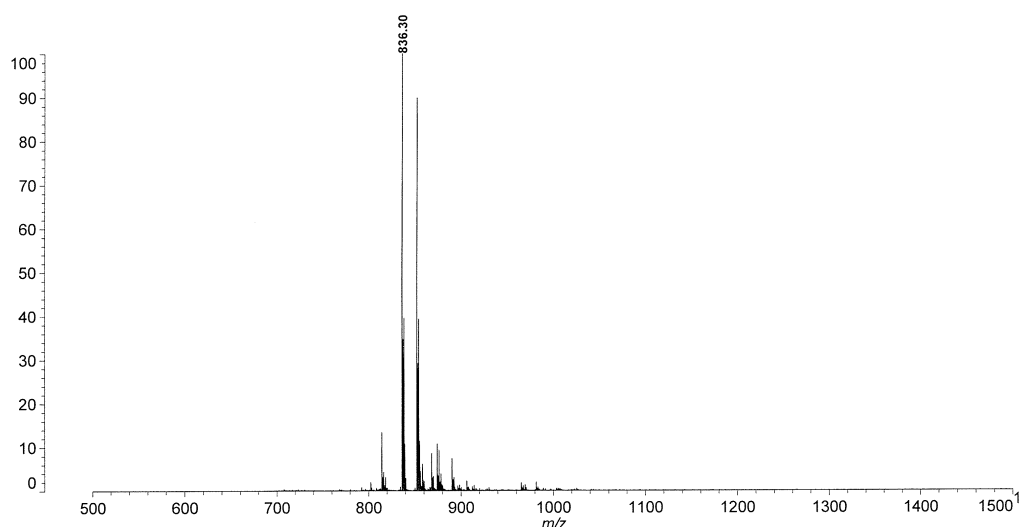

Figure S5. MALDI-TOF mass spectrum of **Cl-3E**.  $\alpha$ -CHCA was used as a matrix. **Cl-3E**: calcd.  $[M+H]^+ = 838.30$  and obsd.  $[M+H]^+ = 836.30$ .

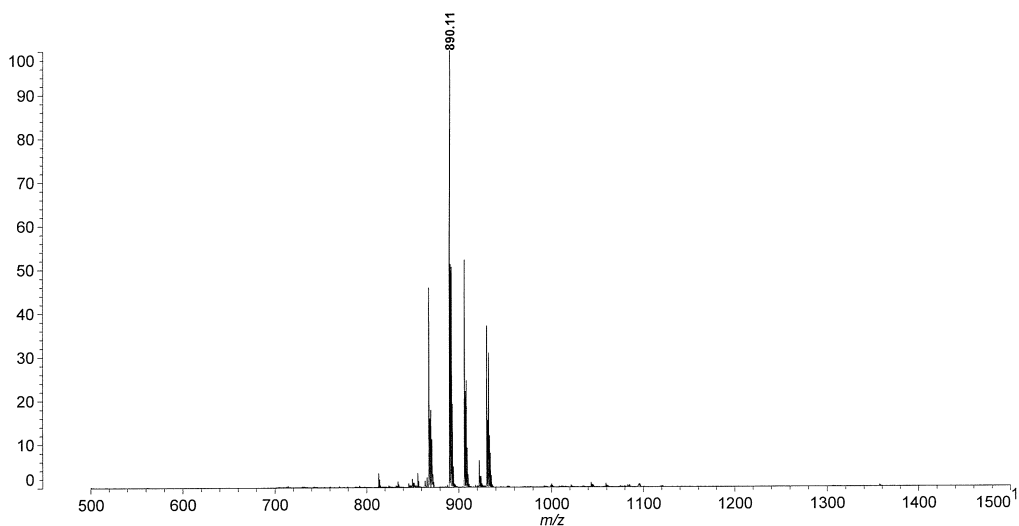

Figure S6. MALDI-TOF mass spectrum of **Cl-3F**.  $\alpha$ -CHCA was used as a matrix. **Cl-3F**: calcd.  $[M+Na]^+ = 892.38$  and obsd.  $[M+Na]^+ = 890.11$ .

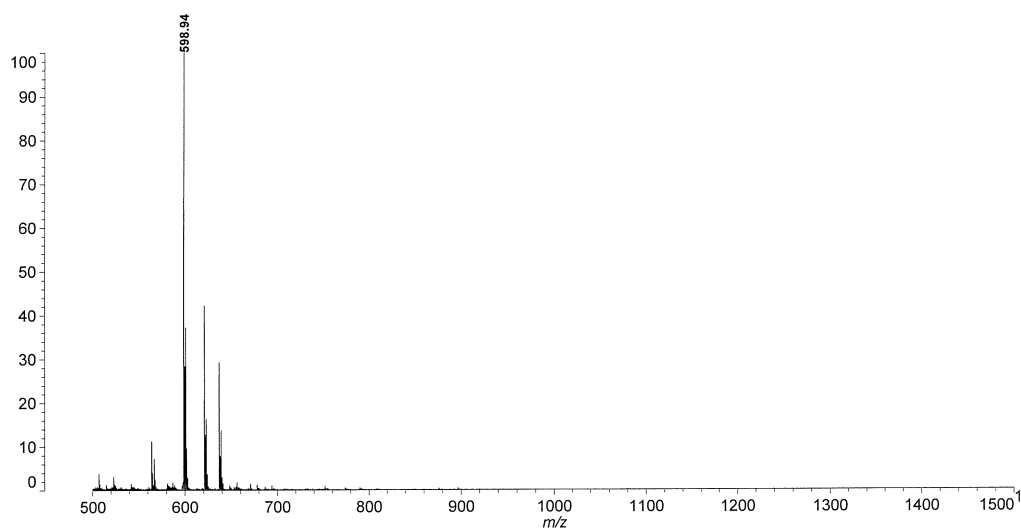

Figure S7. MALDI-TOF mass spectrum of **Cl-3G**.  $\alpha$ -CHCA was used as a matrix. **Cl-3G**: calcd.  $[M+H]^+ = 600.27$  and obsd.  $[M+H]^+ = 598.94$ .

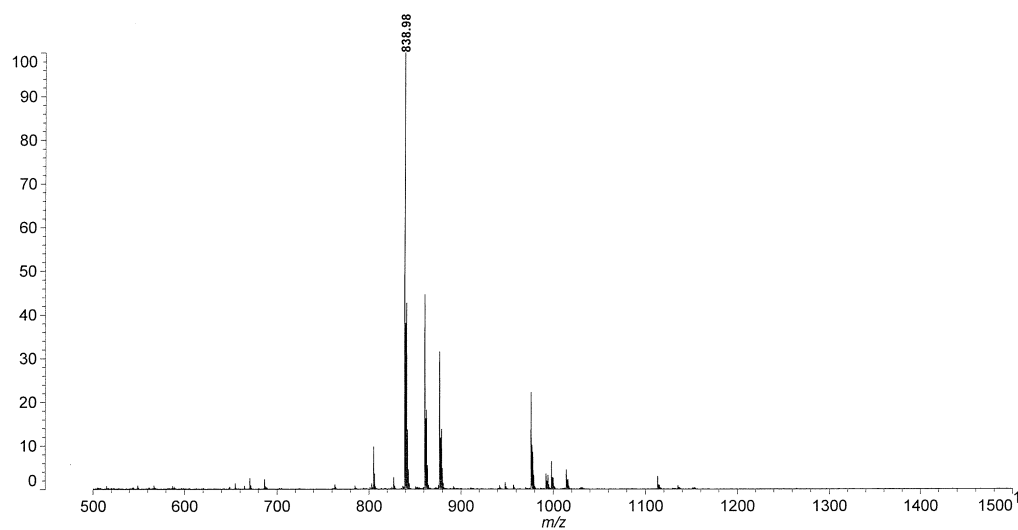

Figure S8. MALDI-TOF mass spectrum of **Cl-3H**.  $\alpha$ -CHCA was used as a matrix. **Cl-3H**: calcd.  $[M+H]^+ = 840.38$  and obsd.  $[M+H]^+ = 838.98$ .

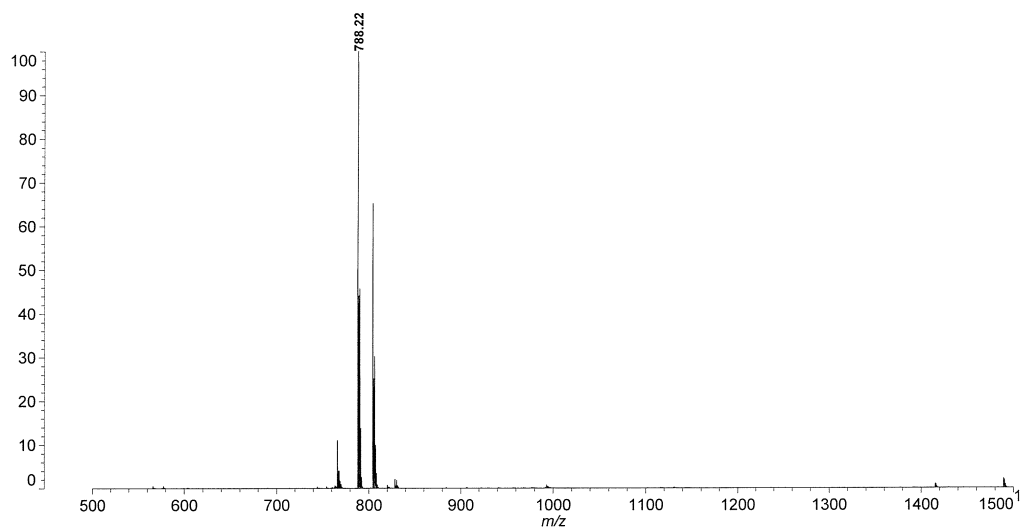

Figure S9. MALDI-TOF mass spectrum of **Cl-3I**.  $\alpha$ -CHCA was used as a matrix. **Cl-3I**: calcd.  $[M+Na]^+ = 790.42$  and obsd.  $[M+Na]^+ = 788.22$ .

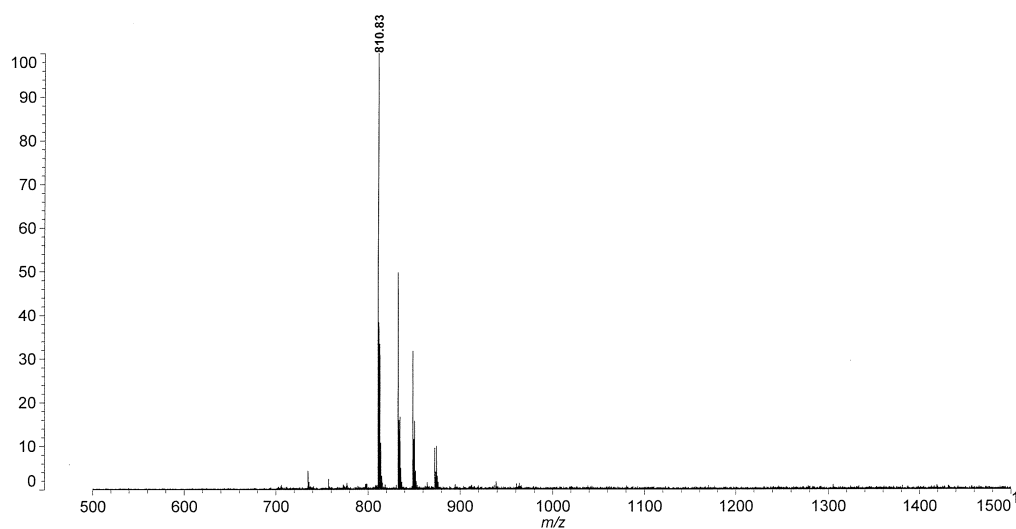

Figure S10. MALDI-TOF mass spectrum of **Cl-3K**.  $\alpha$ -CHCA was used as a matrix. **Cl-3K**: calcd.  $[M+H]^+ = 813.49$  and obsd.  $[M+H]^+ = 810.83$ .

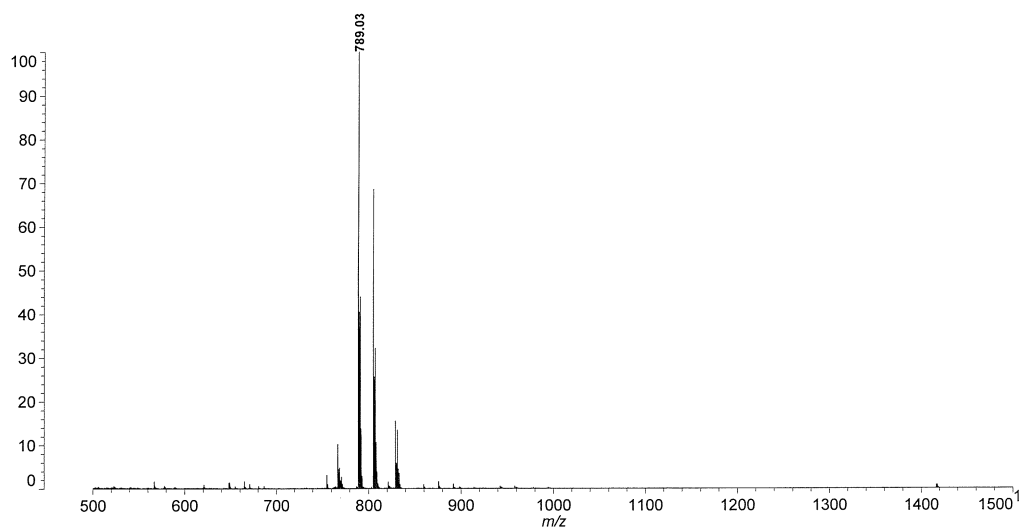

Figure S11. MALDI-TOF mass spectrum of **Cl-3L**.  $\alpha$ -CHCA was used as a matrix. **Cl-3L**: calcd.  $[M+Na]^+ = 790.42$  and obsd.  $[M+Na]^+ = 789.03$ .

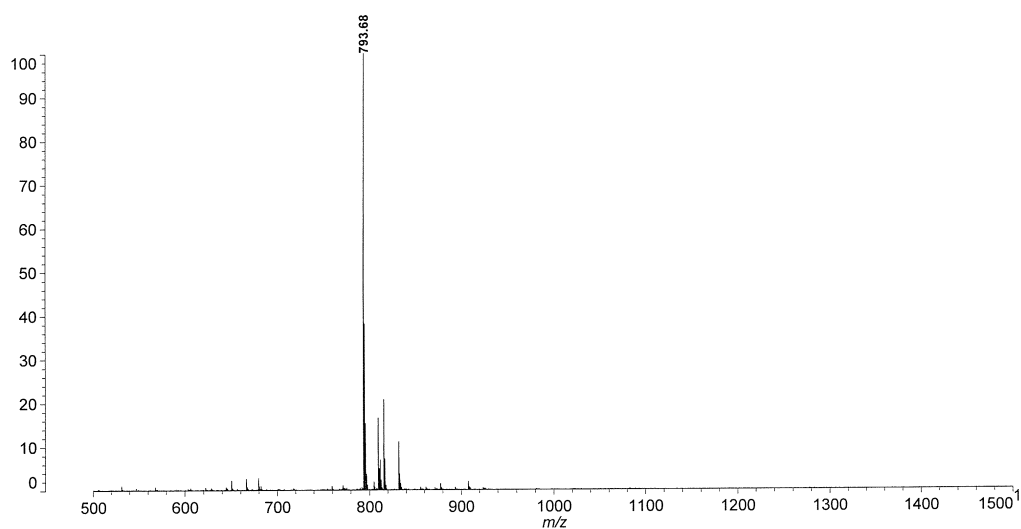

Figure S12. MALDI-TOF mass spectrum of **Cl-3N**.  $\alpha$ -CHCA was used as a matrix. **Cl-3N**: calcd.  $[M+Na]^+ = 793.31$  and obsd.  $[M+Na]^+ = 793.68$ .

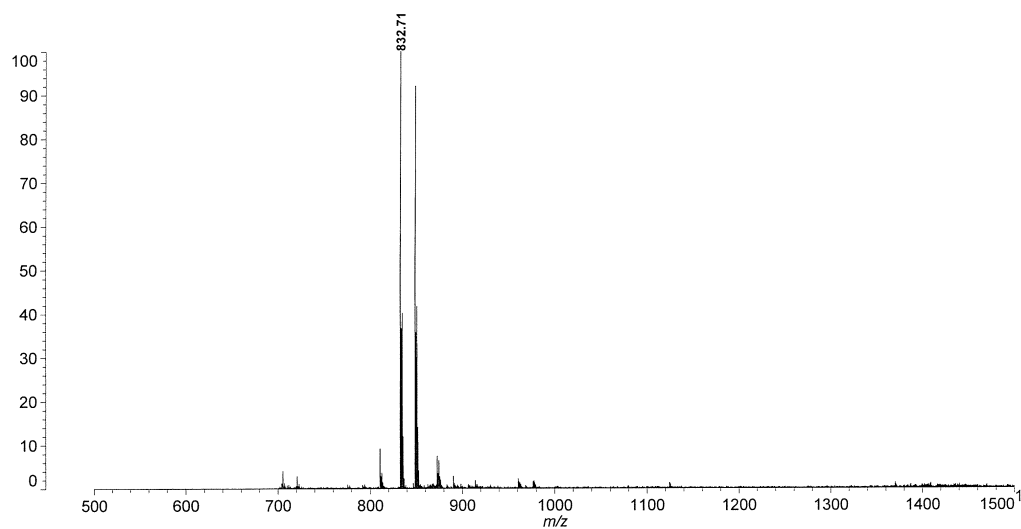

Figure S13. MALDI-TOF mass spectrum of **Cl-3Q**.  $\alpha$ -CHCA was used as a matrix. **Cl-3Q**: calcd.  $[M+Na]^+ = 835.35$  and obsd.  $[M+Na]^+ = 832.71$ .

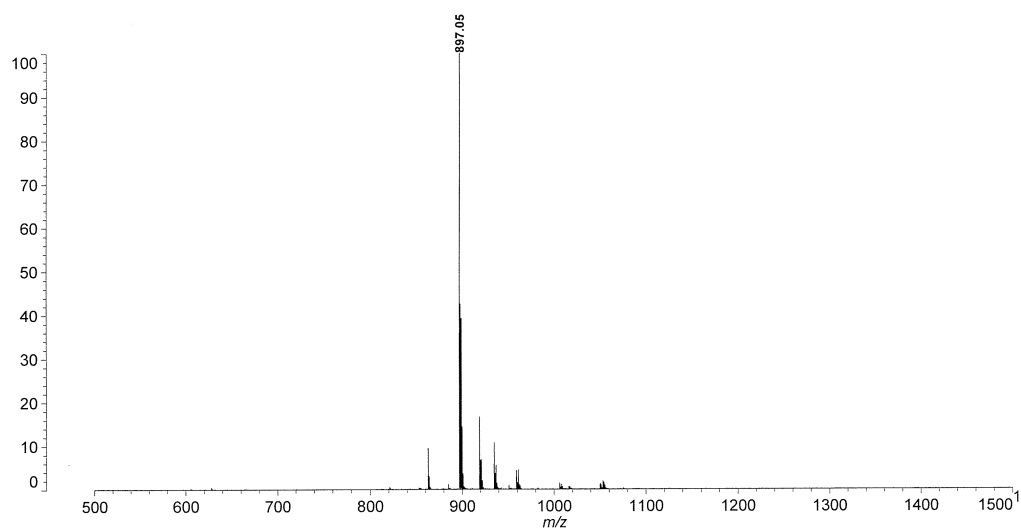

Figure S14. MALDI-TOF mass spectrum of **Cl-3R**.  $\alpha$ -CHCA was used as a matrix. **Cl-3R**: calcd.  $[M+H]^+ = 898.48$  and obsd.  $[M+H]^+ = 897.05$ .



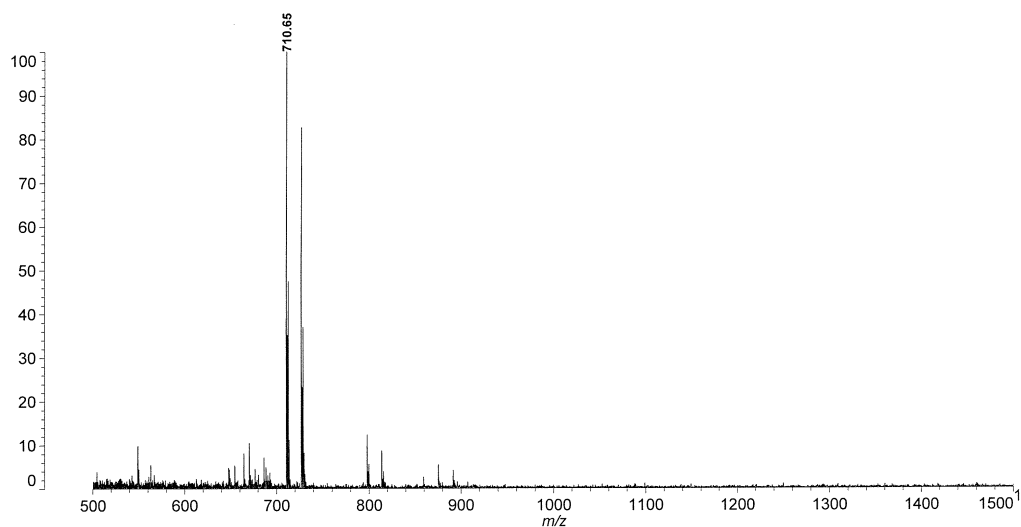

Figure S15. MALDI-TOF mass spectrum of **Cl-3S**.  $\alpha$ -CHCA was used as a matrix. **Cl-3S**: calcd.  $[M+H]^+ = 712.28$  and obsd.  $[M+H]^+ = 710.65$ .

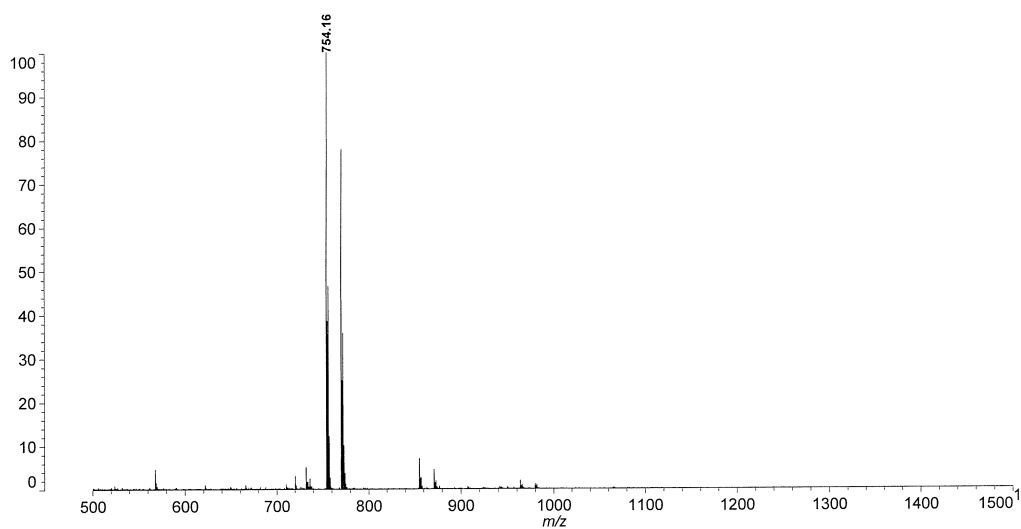

Figure S16. MALDI-TOF mass spectrum of **Cl-3T**.  $\alpha$ -CHCA was used as a matrix. **Cl-3T**: calcd.  $[M+Na]^+ = 754.32$  and obsd.  $[M+Na]^+ = 754.16$ .

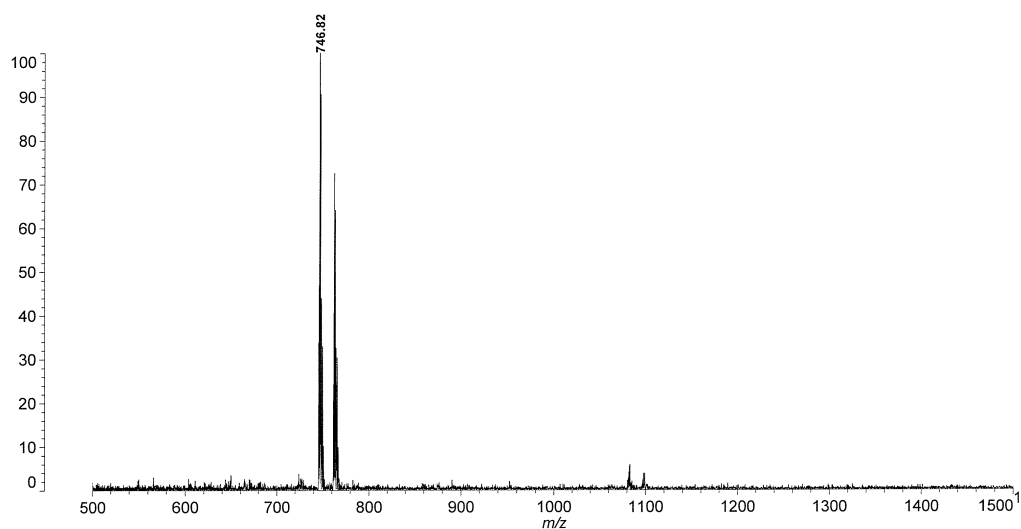

Figure S17. MALDI-TOF mass spectrum of **Cl-3V**.  $\alpha$ -CHCA was used as a matrix. **Cl-3V**: calcd.  $[M+Na]^+ = 748.39$  and obsd.  $[M+Na]^+ = 746.82$ .

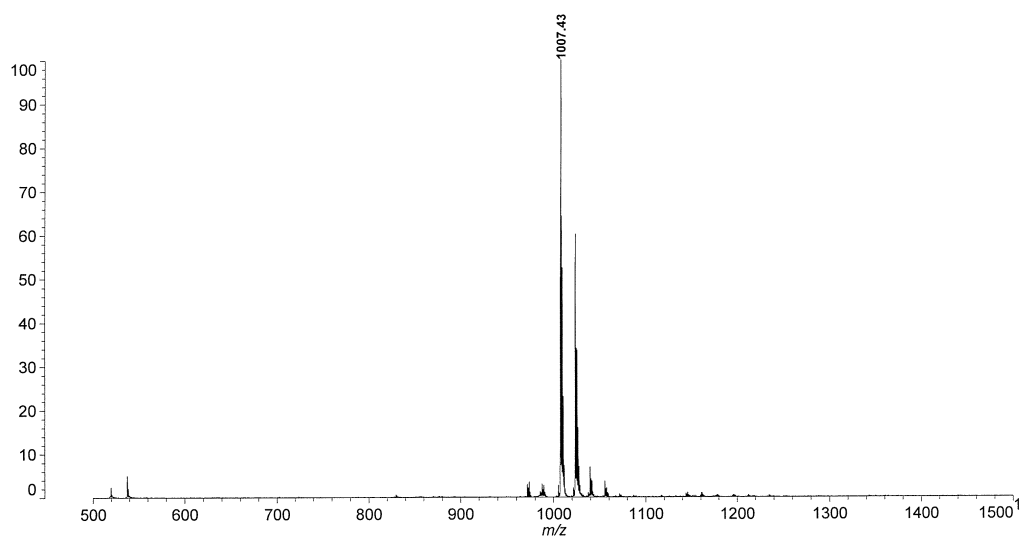

Figure S18. MALDI-TOF mass spectrum of **Cl-3W**.  $\alpha$ -CHCA was used as a matrix. **Cl-3W**: calcd.  $[M+H]^+ = 1009.42$  and obsd.  $[M+H]^+ = 1007.43$ .

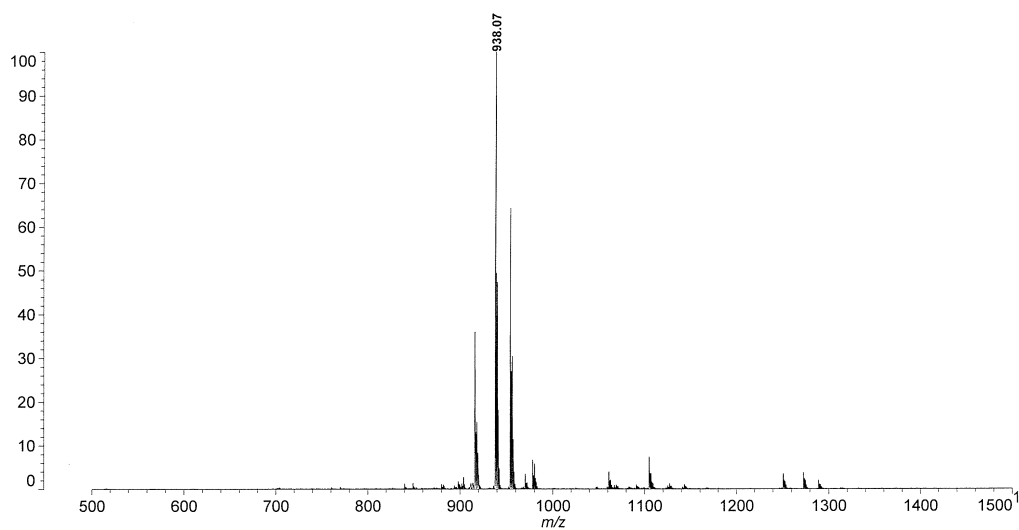

Figure S19. MALDI-TOF mass spectrum of **Cl-3Y**.  $\alpha$ -CHCA was used as a matrix. **Cl-3Y**: calcd.  $[M+H]^+ = 940.36$  and obsd.  $[M+H]^+ = 938.07$ .

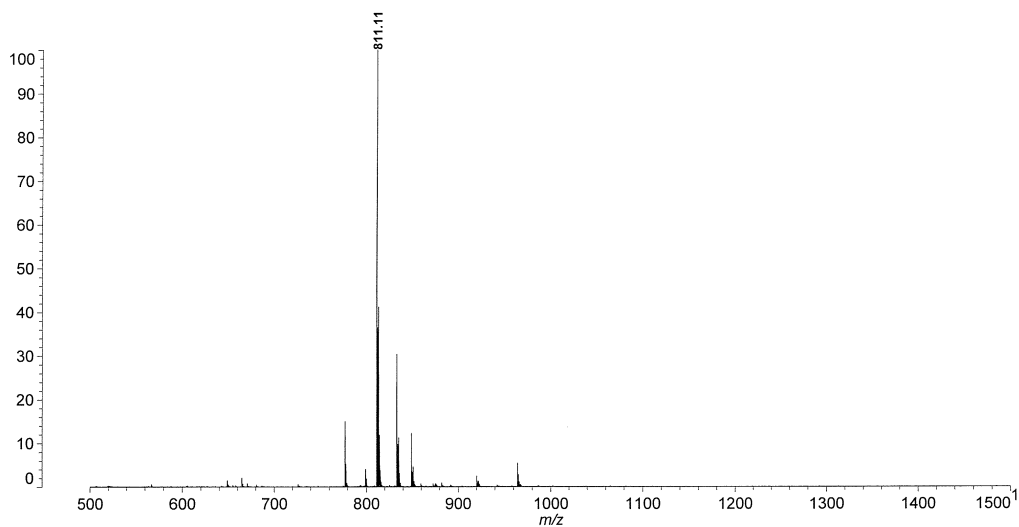

Figure S20. MALDI-TOF mass spectrum of **Cl-2R**.  $\alpha$ -CHCA was used as a matrix. **Cl-2R**: calcd.  $[M+H]^+ = 812.44$  and obsd.  $[M+H]^+ = 811.11$ .

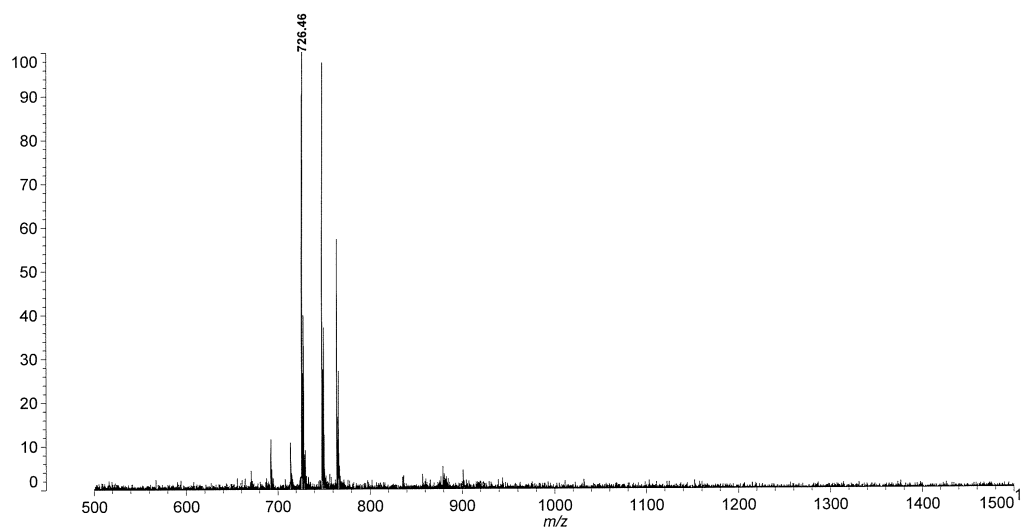

Figure S21. MALDI-TOF mass spectrum of **Cl-1R**.  $\alpha$ -CHCA was used as a matrix. **Cl-1R**: calcd.  $[M+H]^+ = 727.38$  and obsd.  $[M+H]^+ = 726.46$ .

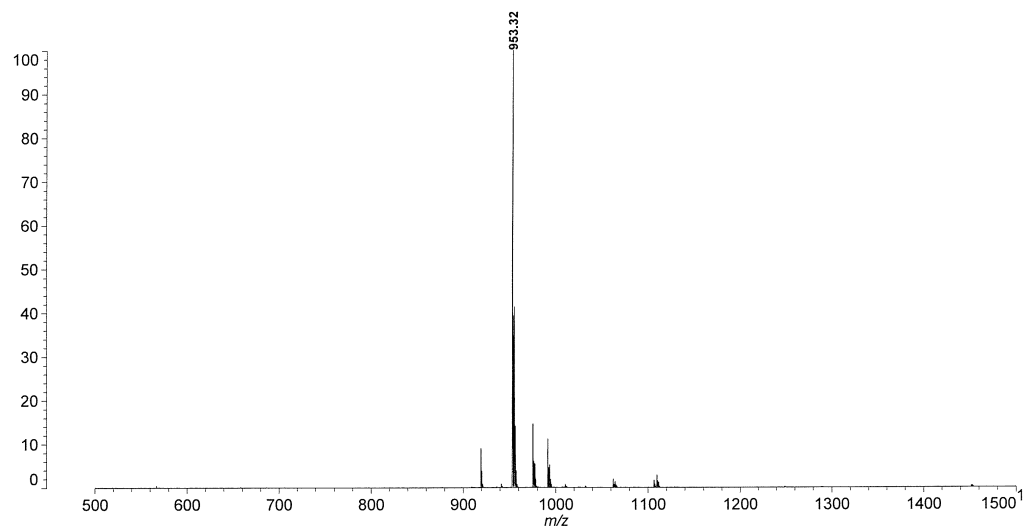

Figure S22. MALDI-TOF mass spectrum of **Cl-C1-3R**.  $\alpha$ -CHCA was used as a matrix. **Cl-C1-3R**: calcd.  $[M+H]^+ = 954.53$  and obsd.  $[M+H]^+ = 953.32$ .

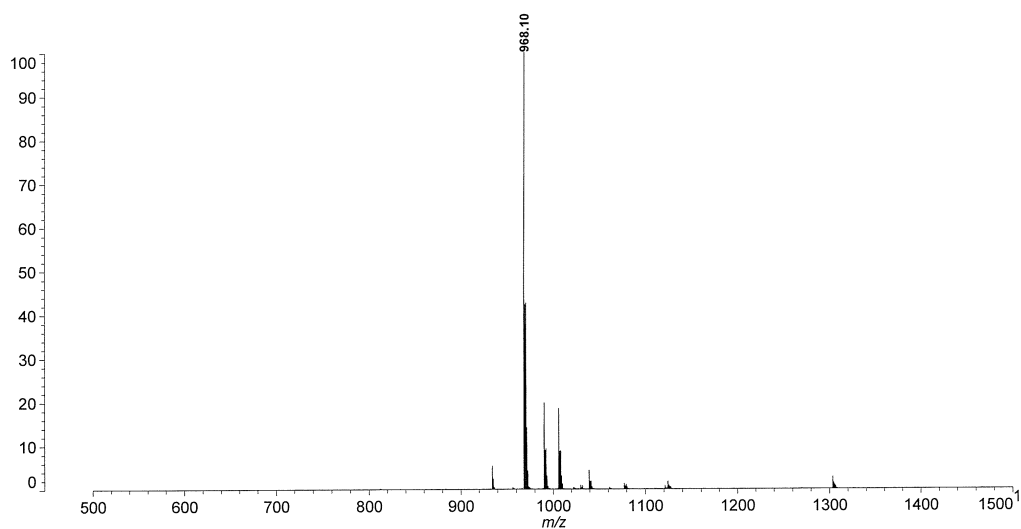

Figure S23. MALDI-TOF mass spectrum of **Cl-C2-3R**.  $\alpha$ -CHCA was used as a matrix. **Cl-C2-3R**: calcd.  $[M+H]^+ = 968.54$  and obsd.  $[M+H]^+ = 968.10$ .

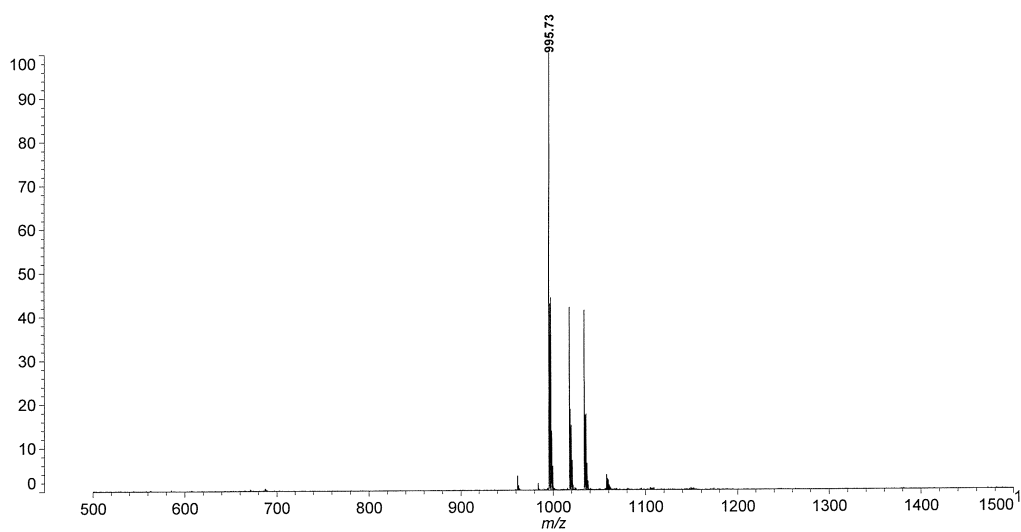

Figure S24. MALDI-TOF mass spectrum of **Cl-C4-3R**.  $\alpha$ -CHCA was used as a matrix. **Cl-C4-3R**: calcd.  $[M+H]^+ = 996.57$  and obsd.  $[M+H]^+ = 995.73$ .

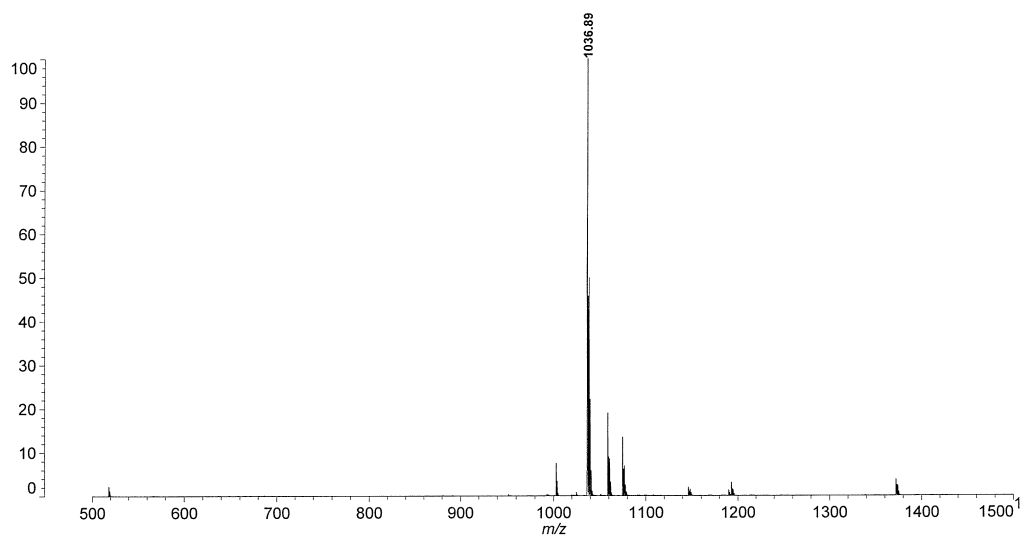

Figure S25. MALDI-TOF mass spectrum of **Cl-C7-3R**.  $\alpha$ -CHCA was used as a matrix. **Cl-C7-3R**: calcd.  $[M+H]^+ = 1038.62$  and obsd.  $[M+H]^+ = 1036.89$ .

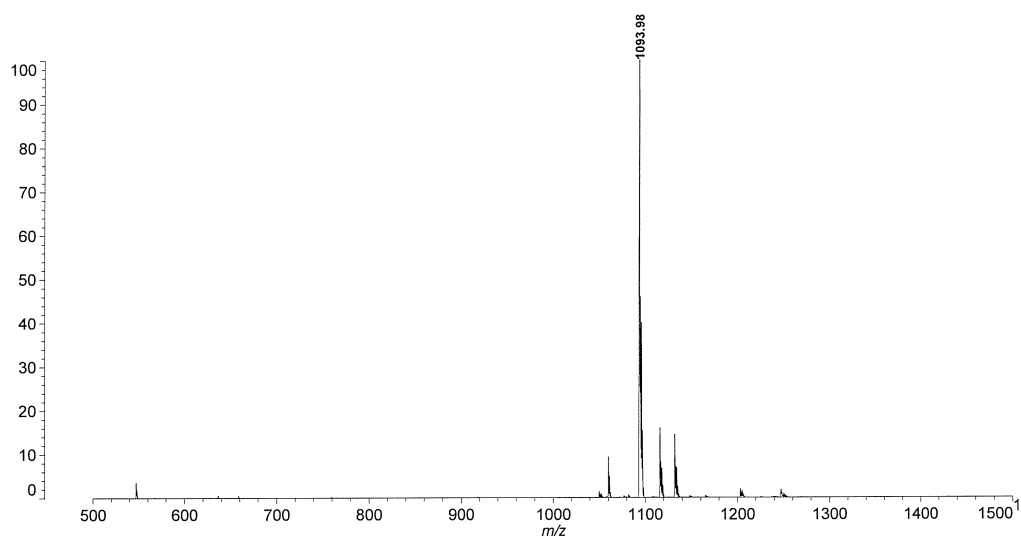

Figure S26. MALDI-TOF mass spectrum of **Cl-C11-3R**.  $\alpha$ -CHCA was used as a matrix. **Cl-C11-3R**: calcd.  $[M+H]^+ = 1095.81$  and obsd.  $[M+H]^+ = 1093.98$ .

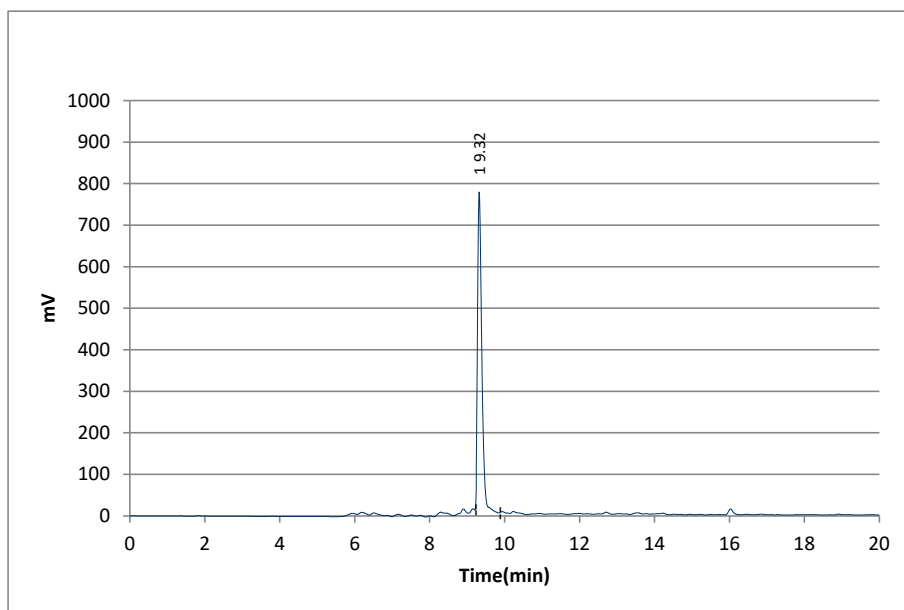

Figure S27. HPLC chromatogram of **Cl-3A**. The mobile phase consisted of 0.1% TFA aq. (solvent A) and acetonitrile (solvent B) at a flow rate of 1.0 mL/min and was used as a linear gradient from 0% to 100% of solvent B for 20 min. The peak was detected by measuring absorption at 230 nm.

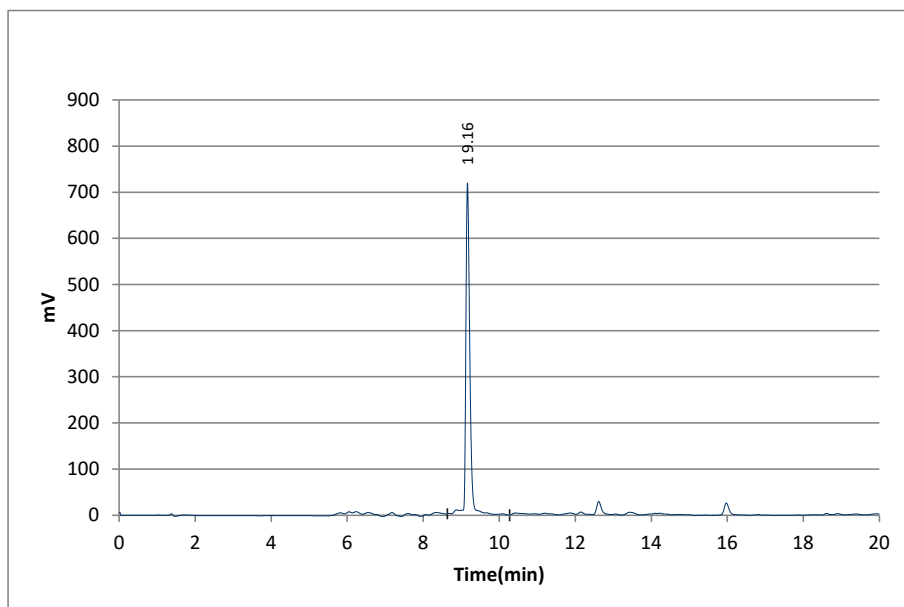

Figure S28. HPLC chromatogram of **Cl-3D**. The mobile phase consisted of 0.1% TFA aq. (solvent A) and acetonitrile (solvent B) at a flow rate of 1.0 mL/min and was used as a linear gradient from 0% to 100% of solvent B for 20 min. The peak was detected by measuring absorption at 230 nm.

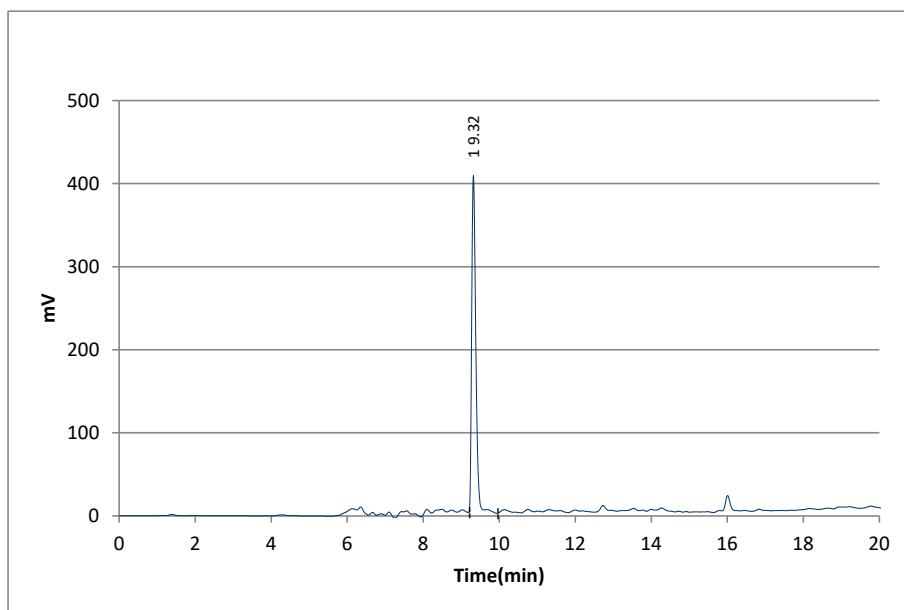

Figure S29. HPLC chromatogram of **Cl-3E**. The mobile phase consisted of 0.1% TFA aq. (solvent A) and acetonitrile (solvent B) at a flow rate of 1.0 mL/min and was used as a linear gradient from 0% to 100% of solvent B for 20 min. The peak was detected by measuring absorption at 230 nm.

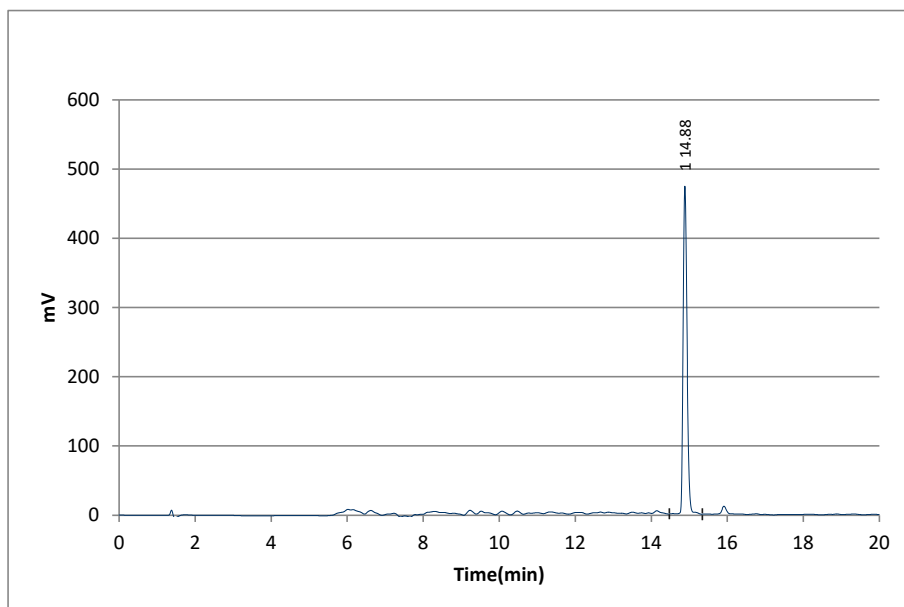

Figure S30. HPLC chromatogram of **Cl-3F**. The mobile phase consisted of 0.1% TFA aq. (solvent A) and acetonitrile (solvent B) at a flow rate of 1.0 mL/min and was used as a linear gradient from 0% to 100% of solvent B for 20 min. The peak was detected by measuring absorption at 230 nm.



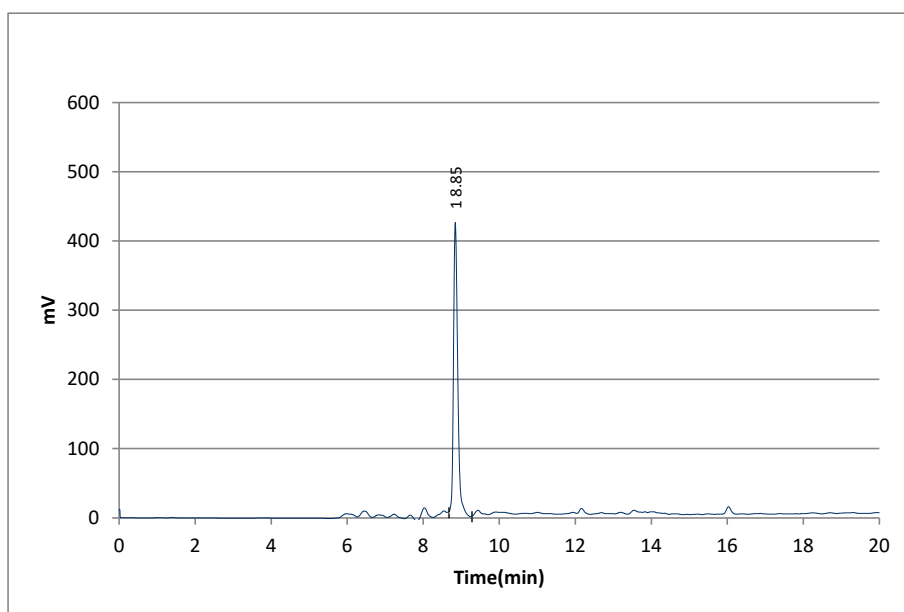

Figure S31. HPLC chromatogram of **Cl-3G**. The mobile phase consisted of 0.1% TFA aq. (solvent A) and acetonitrile (solvent B) at a flow rate of 1.0 mL/min and was used as a linear gradient from 0% to 100% of solvent B for 20 min. The peak was detected by measuring absorption at 230 nm.

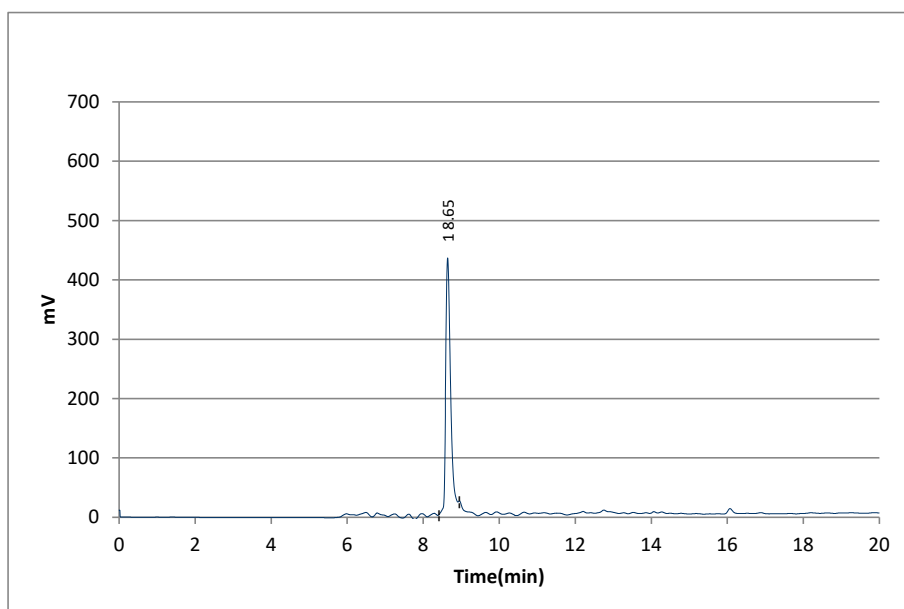

Figure S32. HPLC chromatogram of **Cl-3H**. The mobile phase consisted of 0.1% TFA aq. (solvent A) and acetonitrile (solvent B) at a flow rate of 1.0 mL/min and was used as a linear gradient from 0% to 100% of solvent B for 20 min. The peak was detected by measuring absorption at 230 nm.

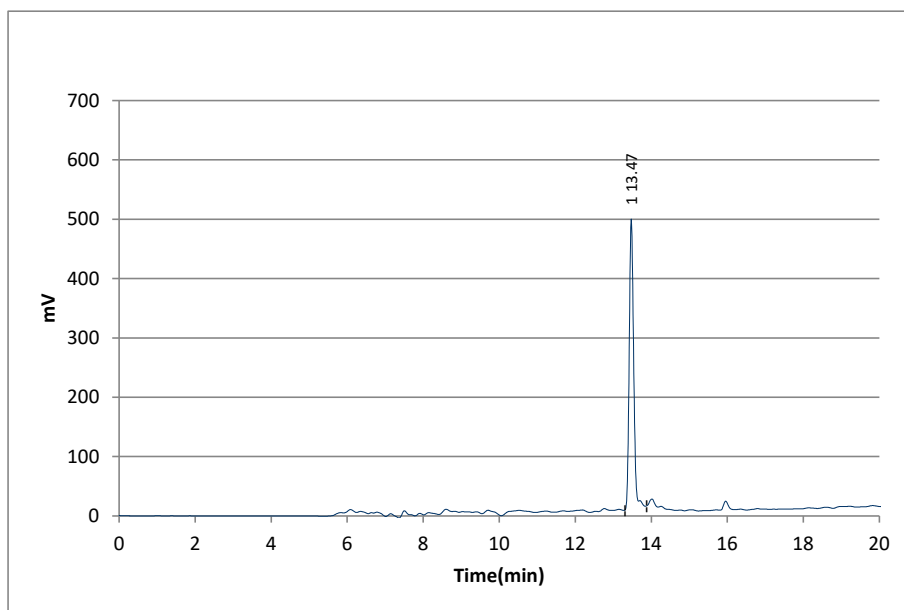

Figure S33. HPLC chromatogram of **Cl-3I**. The mobile phase consisted of 0.1% TFA aq. (solvent A) and acetonitrile (solvent B) at a flow rate of 1.0 mL/min and was used as a linear gradient from 0% to 100% of solvent B for 20 min. The peak was detected by measuring absorption at 230 nm.

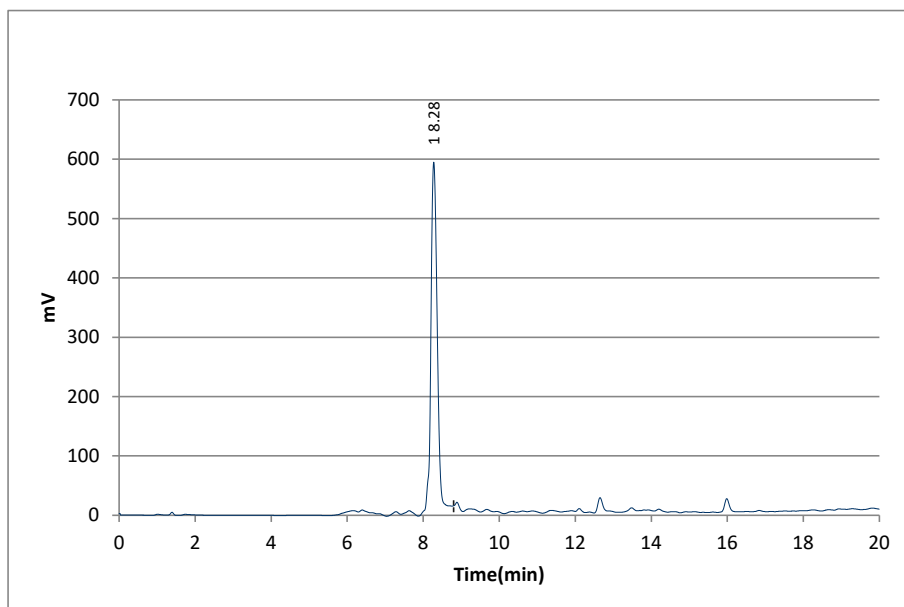

Figure S34. HPLC chromatogram of **Cl-3K**. The mobile phase consisted of 0.1% TFA aq. (solvent A) and acetonitrile (solvent B) at a flow rate of 1.0 mL/min and was used as a linear gradient from 0% to 100% of solvent B for 20 min. The peak was detected by measuring absorption at 230 nm.

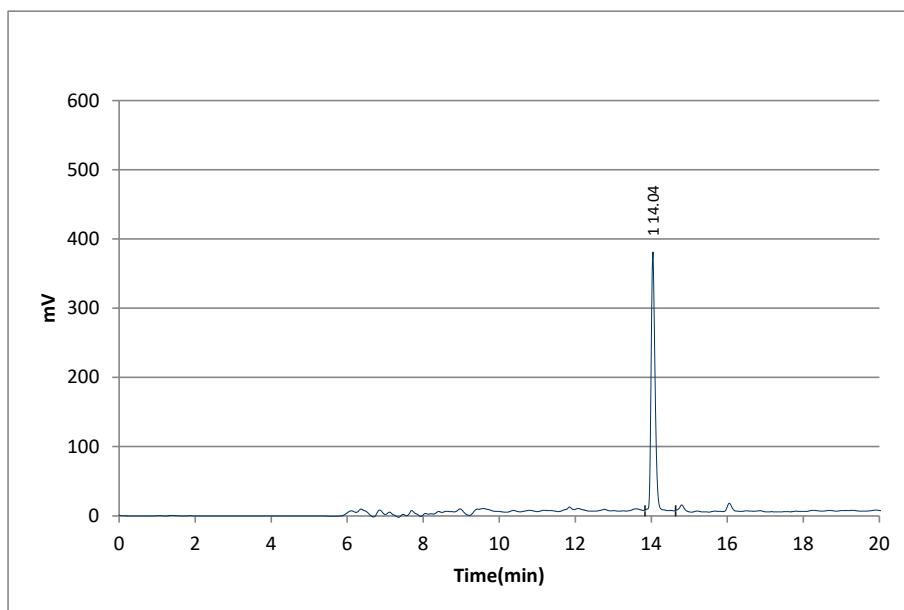

Figure S35. HPLC chromatogram of **Cl-3L**. The mobile phase consisted of 0.1% TFA aq. (solvent A) and acetonitrile (solvent B) at a flow rate of 1.0 mL/min and was used as a linear gradient from 0% to 100% of solvent B for 20 min. The peak was detected by measuring absorption at 230 nm.

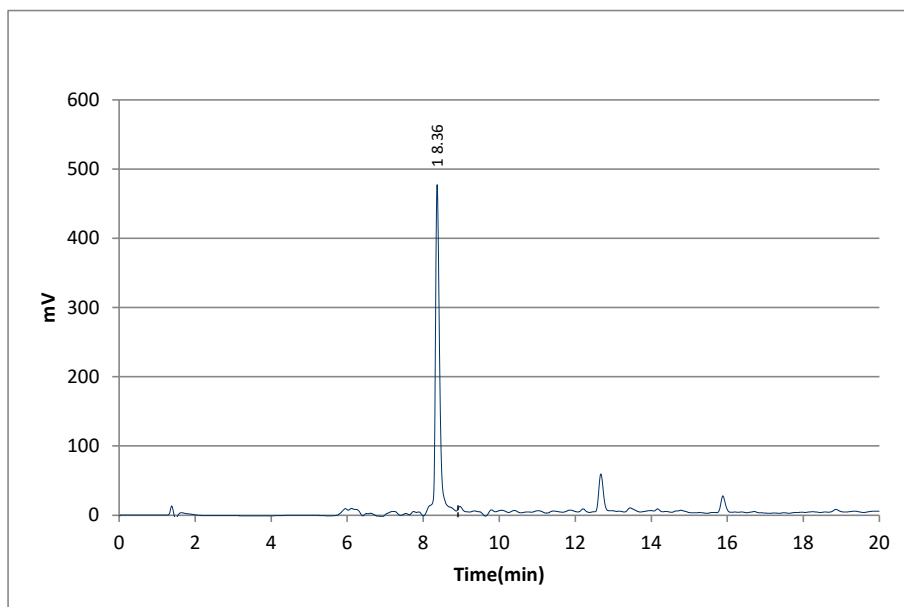

Figure S36. HPLC chromatogram of **Cl-3N**. The mobile phase consisted of 0.1% TFA aq. (solvent A) and acetonitrile (solvent B) at a flow rate of 1.0 mL/min and was used as a linear gradient from 0% to 100% of solvent B for 20 min. The peak was detected by measuring absorption at 230 nm.

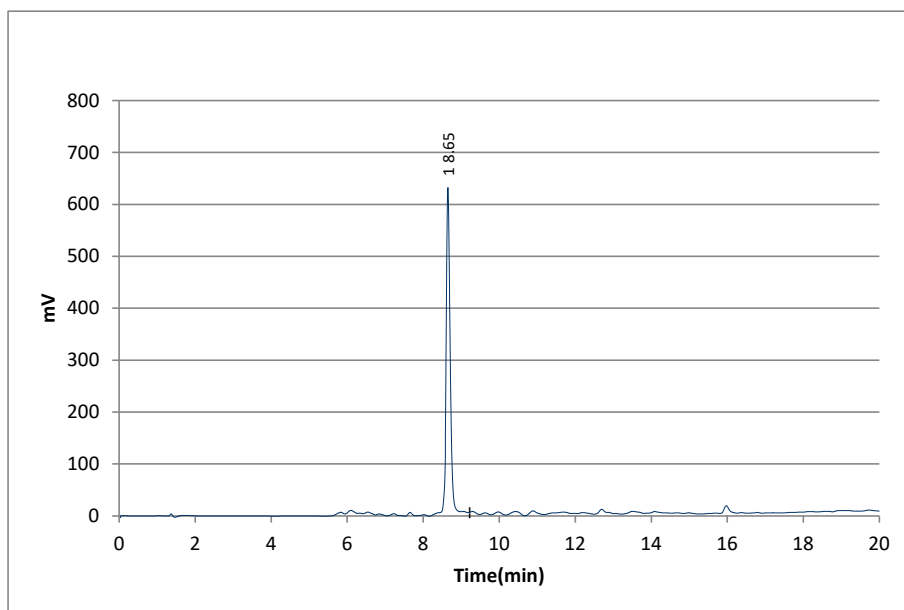

Figure S37. HPLC chromatogram of **Cl-3Q**. The mobile phase consisted of 0.1% TFA aq. (solvent A) and acetonitrile (solvent B) at a flow rate of 1.0 mL/min and was used as a linear gradient from 0% to 100% of solvent B for 20 min. The peak was detected by measuring absorption at 230 nm.

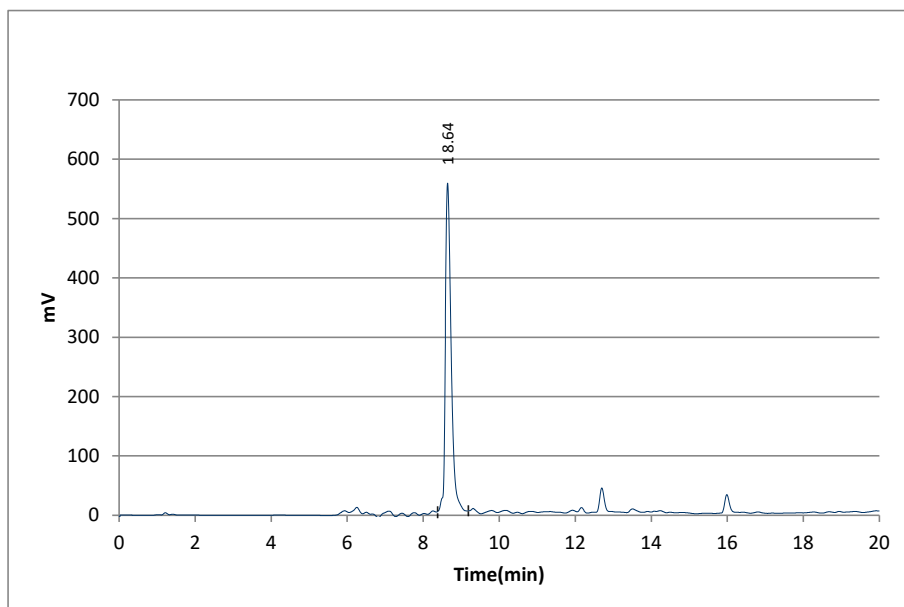

Figure S38. HPLC chromatogram of **Cl-3R**. The mobile phase consisted of 0.1% TFA aq. (solvent A) and acetonitrile (solvent B) at a flow rate of 1.0 mL/min and was used as a linear gradient from 0% to 100% of solvent B for 20 min. The peak was detected by measuring absorption at 230 nm.

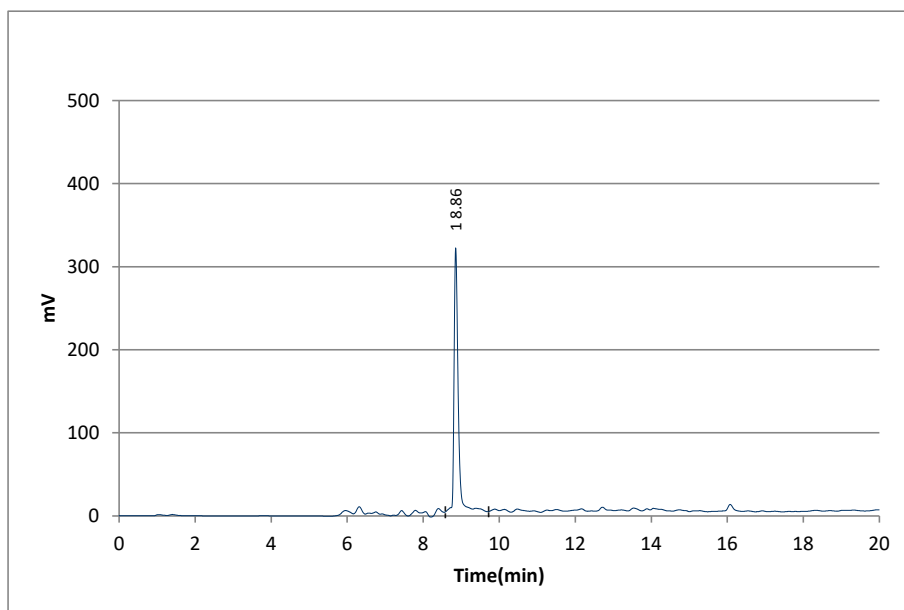

Figure S39. HPLC chromatogram of **Cl-3S**. The mobile phase consisted of 0.1% TFA aq. (solvent A) and acetonitrile (solvent B) at a flow rate of 1.0 mL/min and was used as a linear gradient from 0% to 100% of solvent B for 20 min. The peak was detected by measuring absorption at 230 nm.

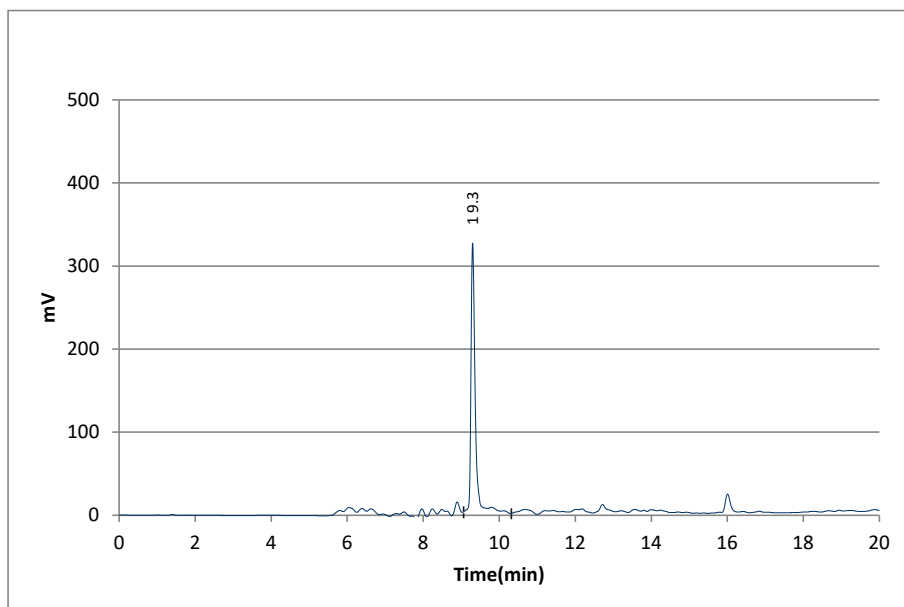

Figure S40. HPLC chromatogram of **Cl-3T**. The mobile phase consisted of 0.1% TFA aq. (solvent A) and acetonitrile (solvent B) at a flow rate of 1.0 mL/min and was used as a linear gradient from 0% to 100% of solvent B for 20 min. The peak was detected by measuring absorption at 230 nm.

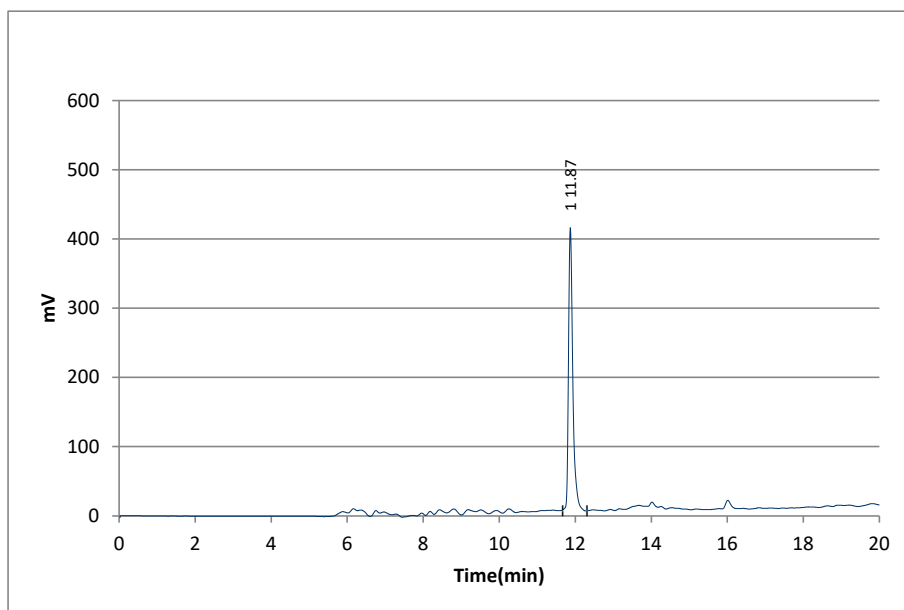

Figure S41. HPLC chromatogram of **Cl-3V**. The mobile phase consisted of 0.1% TFA aq. (solvent A) and acetonitrile (solvent B) at a flow rate of 1.0 mL/min and was used as a linear gradient from 0% to 100% of solvent B for 20 min. The peak was detected by measuring absorption at 230 nm.

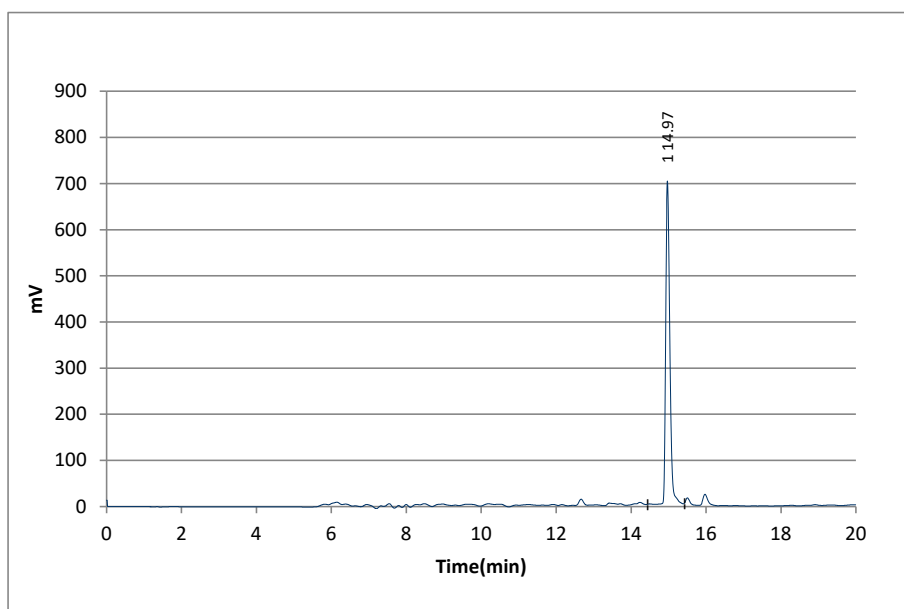

Figure S42. HPLC chromatogram of **Cl-3W**. The mobile phase consisted of 0.1% TFA aq. (solvent A) and acetonitrile (solvent B) at a flow rate of 1.0 mL/min and was used as a linear gradient from 0% to 100% of solvent B for 20 min. The peak was detected by measuring absorption at 230 nm.

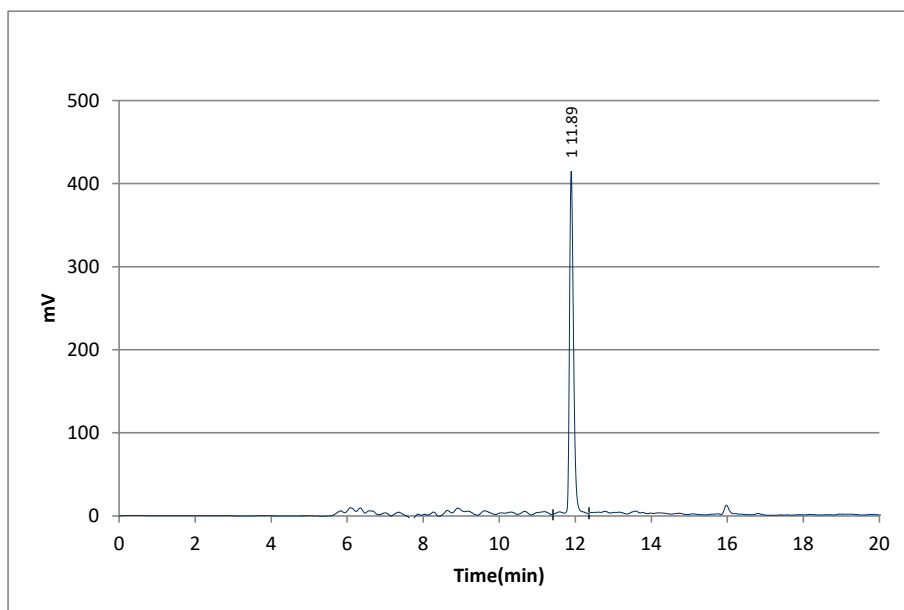

Figure S43. HPLC chromatogram of **Cl-3Y**. The mobile phase consisted of 0.1% TFA aq. (solvent A) and acetonitrile (solvent B) at a flow rate of 1.0 mL/min and was used as a linear gradient from 0% to 100% of solvent B for 20 min. The peak was detected by measuring absorption at 230 nm.

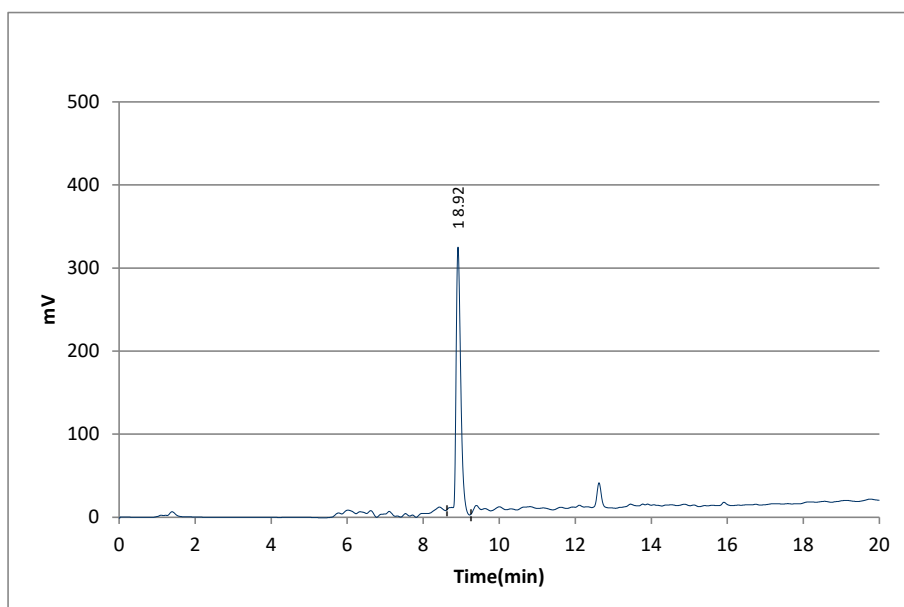

Figure S44. HPLC chromatogram of **Cl-2R**. The mobile phase consisted of 0.1% TFA aq. (solvent A) and acetonitrile (solvent B) at a flow rate of 1.0 mL/min and was used as a linear gradient from 0% to 100% of solvent B for 20 min. The peak was detected by measuring absorption at 230 nm.

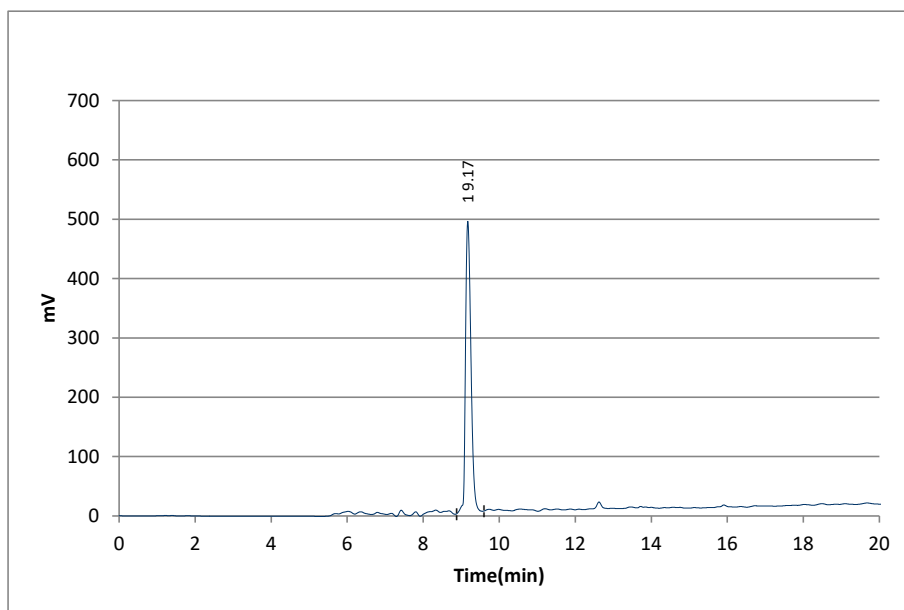

Figure S45. HPLC chromatogram of **Cl-1R**. The mobile phase consisted of 0.1% TFA aq. (solvent A) and acetonitrile (solvent B) at a flow rate of 1.0 mL/min and was used as a linear gradient from 0% to 100% of solvent B for 20 min. The peak was detected by measuring absorption at 230 nm.

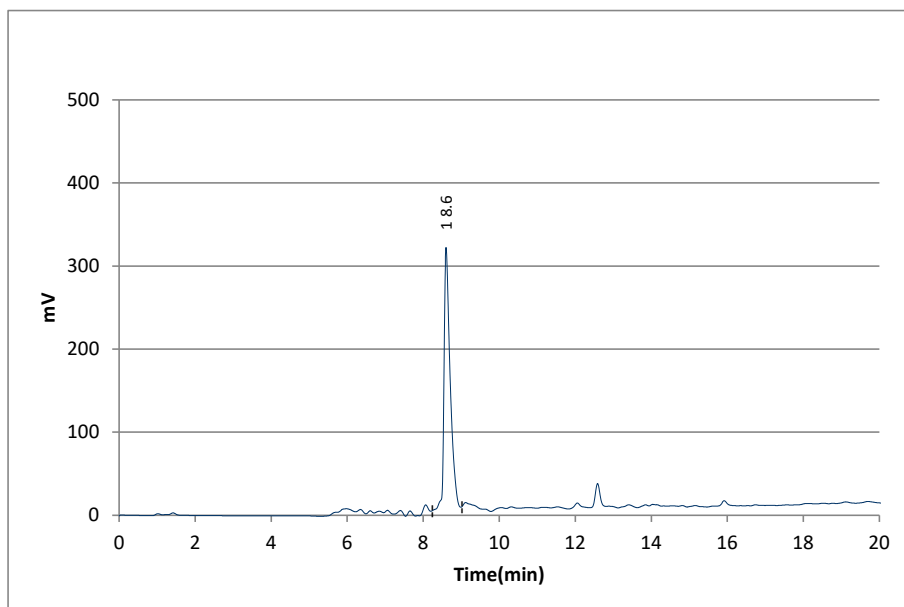

Figure S46. HPLC chromatogram of **Cl-C1-3R**. The mobile phase consisted of 0.1% TFA aq. (solvent A) and acetonitrile (solvent B) at a flow rate of 1.0 mL/min and was used as a linear gradient from 0% to 100% of solvent B for 20 min. The peak was detected by measuring absorption at 230 nm.



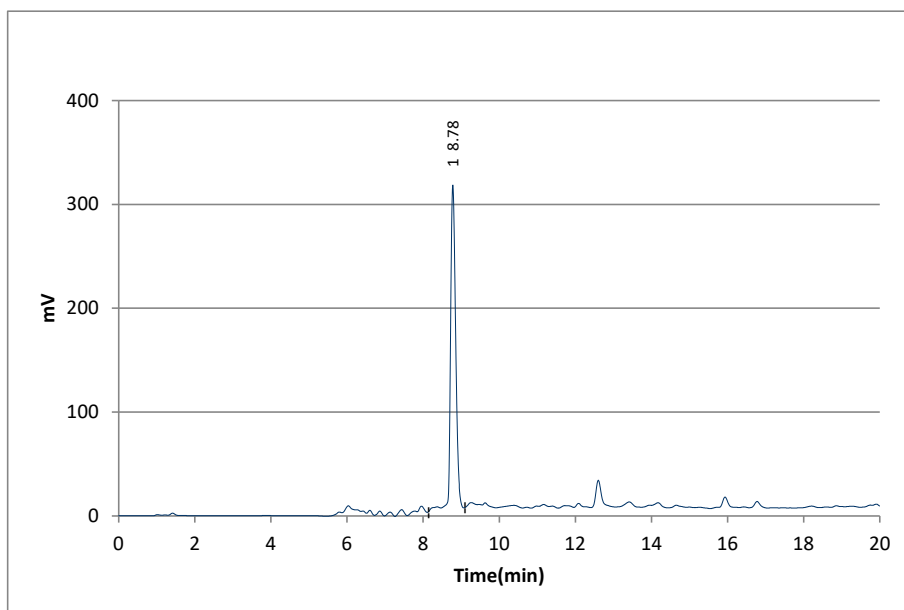

Figure S47. HPLC chromatogram of **Cl-C2-3R**. The mobile phase consisted of 0.1% TFA aq. (solvent A) and acetonitrile (solvent B) at a flow rate of 1.0 mL/min and was used as a linear gradient from 0% to 100% of solvent B for 20 min. The peak was detected by measuring absorption at 230 nm.

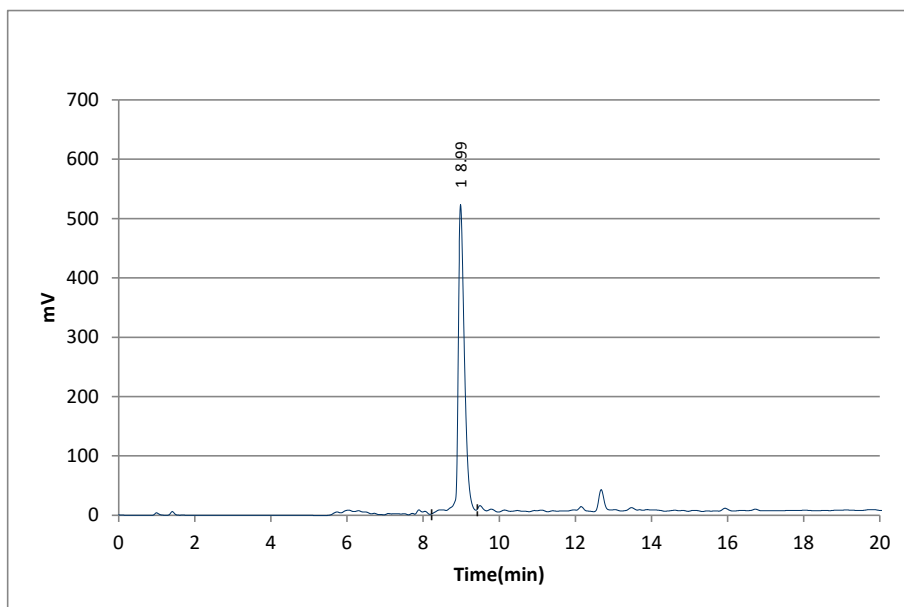

Figure S48. HPLC chromatogram of **Cl-C4-3R**. The mobile phase consisted of 0.1% TFA aq. (solvent A) and acetonitrile (solvent B) at a flow rate of 1.0 mL/min and was used as a linear gradient from 0% to 100% of solvent B for 20 min. The peak was detected by measuring absorption at 230 nm.

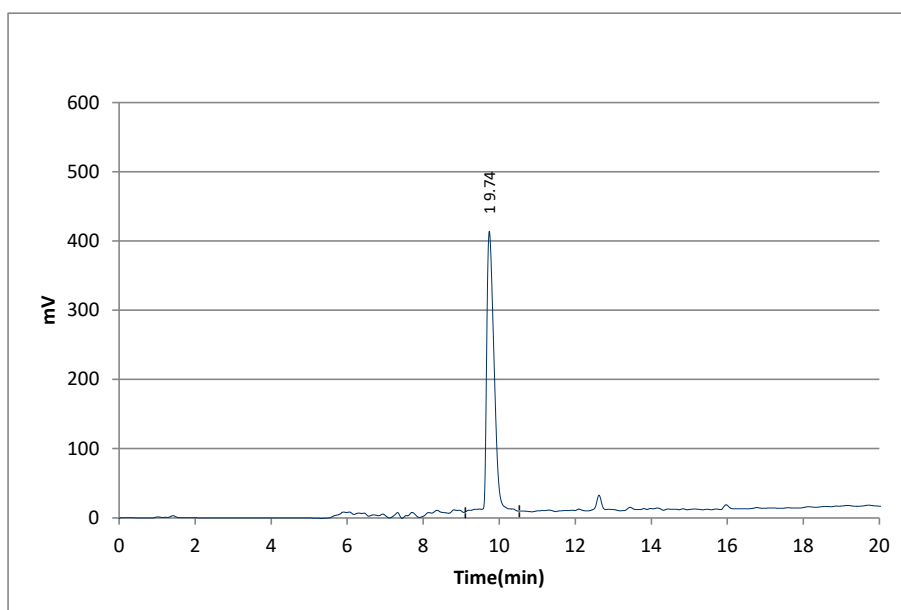

Figure S49. HPLC chromatogram of **Cl-C7-3R**. The mobile phase consisted of 0.1% TFA aq. (solvent A) and acetonitrile (solvent B) at a flow rate of 1.0 mL/min and was used as a linear gradient from 0% to 100% of solvent B for 20 min. The peak was detected by measuring absorption at 230 nm.

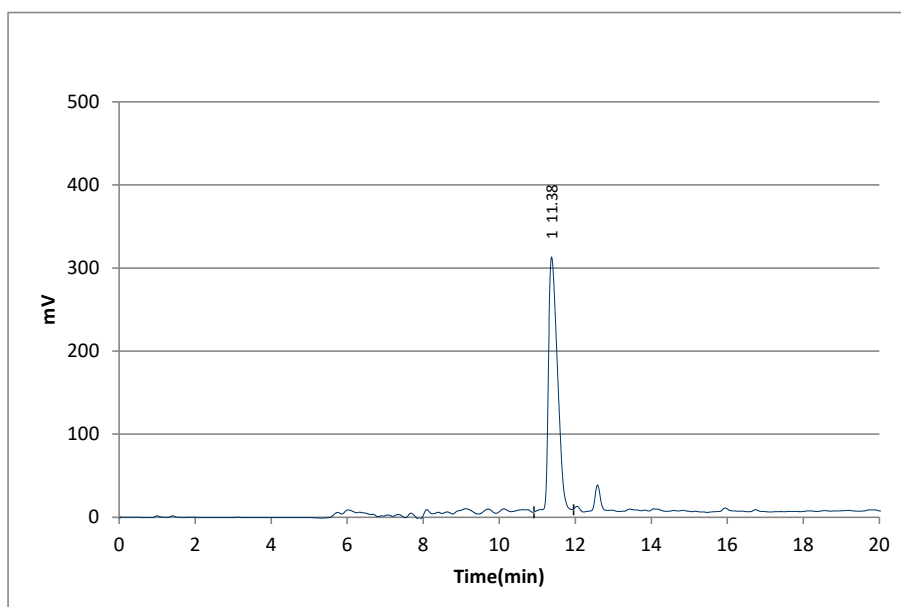

Figure S50. HPLC chromatogram of **Cl-C11-3R**. The mobile phase consisted of 0.1% TFA aq. (solvent A) and acetonitrile (solvent B) at a flow rate of 1.0 mL/min and was used as a linear gradient from 0% to 100% of solvent B for 20 min. The peak was detected by measuring absorption at 230 nm.

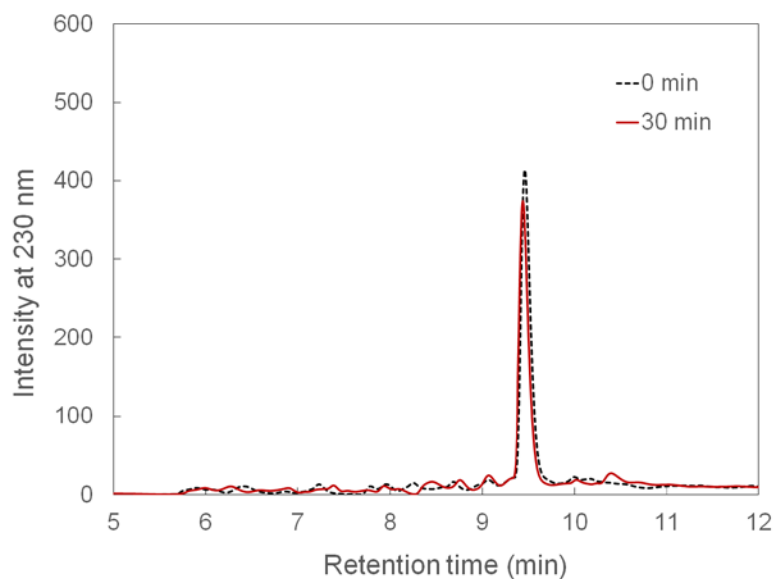

Figure S51. HPLC chromatogram of reaction mixture of **BSH** and **Cl-3A** after 0 and 30 min. The mobile phase consisted of 0.1% TFA aq. (solvent A) and acetonitrile (solvent B) at a flow rate of 1.0 mL/min and was used as a linear gradient from 0% to 100% of solvent B for 20 min. The peak was detected by measuring absorption at 230 nm.

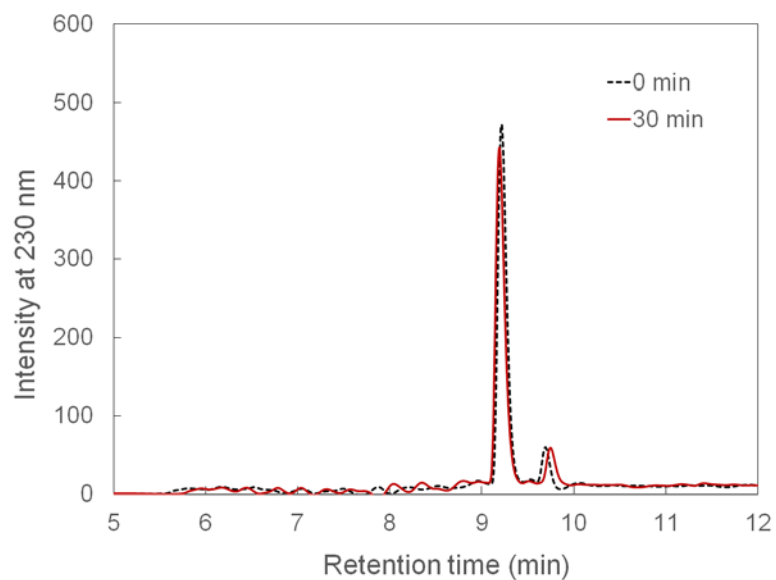

Figure S52. HPLC chromatogram of reaction mixture of **BSH** and **Cl-3D** after 0 and 30 min. The mobile phase consisted of 0.1% TFA aq. (solvent A) and acetonitrile (solvent B) at a flow rate of 1.0 mL/min and was used as a linear gradient from 0% to 100% of solvent B for 20 min. The peak was detected by measuring absorption at 230 nm.

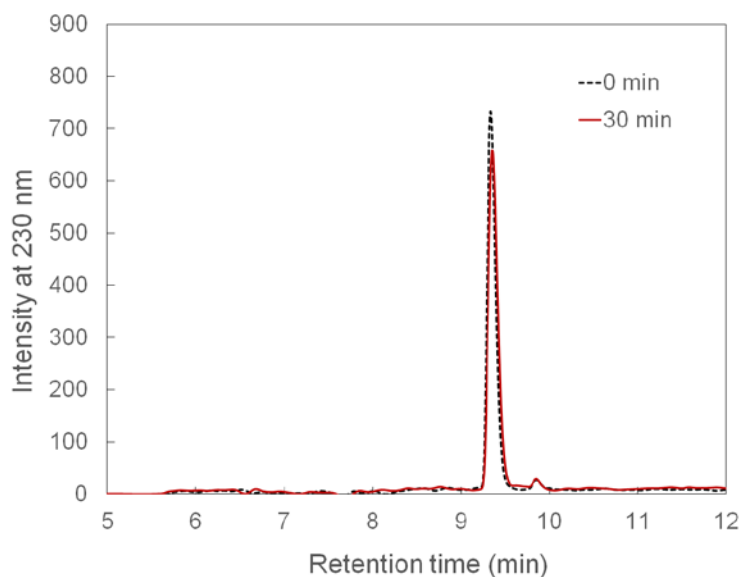

Figure S53. HPLC chromatogram of reaction mixture of **BSH** and **Cl-3E** after 0 and 30 min. The mobile phase consisted of 0.1% TFA aq. (solvent A) and acetonitrile (solvent B) at a flow rate of 1.0 mL/min and was used as a linear gradient from 0% to 100% of solvent B for 20 min. The peak was detected by measuring absorption at 230 nm.

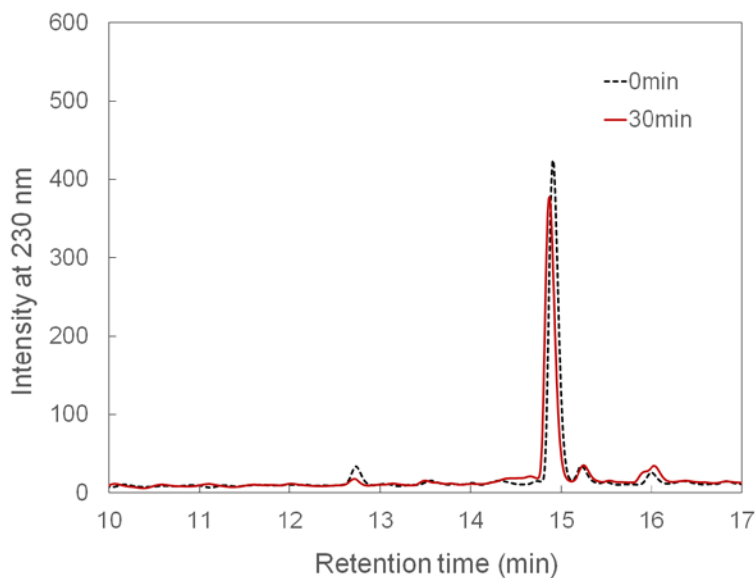

Figure S54. HPLC chromatogram of reaction mixture of **BSH** and **Cl-3F** after 0 and 30 min. The mobile phase consisted of 0.1% TFA aq. (solvent A) and acetonitrile (solvent B) at a flow rate of 1.0 mL/min and was used as a linear gradient from 0% to 100% of solvent B for 20 min. The peak was detected by measuring absorption at 230 nm.

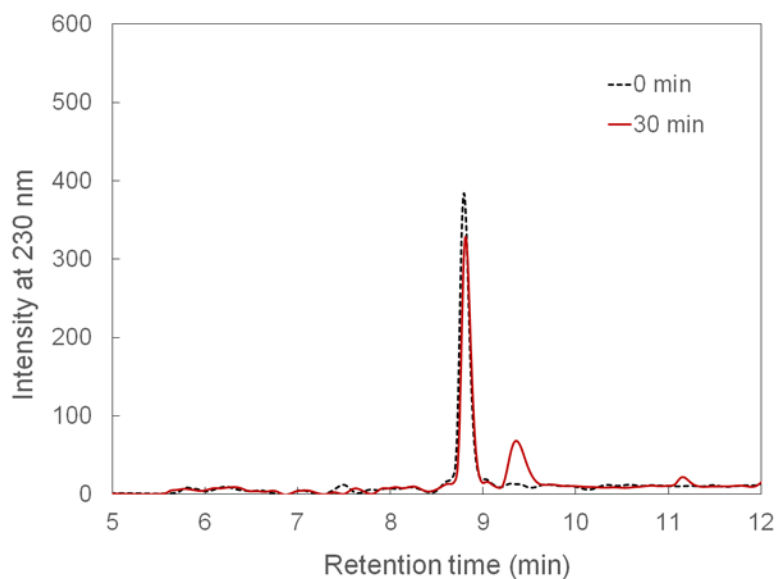

Figure S55. HPLC chromatogram of reaction mixture of **BSH** and **Cl-3G** after 0 and 30 min. The mobile phase consisted of 0.1% TFA aq. (solvent A) and acetonitrile (solvent B) at a flow rate of 1.0 mL/min and was used as a linear gradient from 0% to 100% of solvent B for 20 min. The peak was detected by measuring absorption at 230 nm.

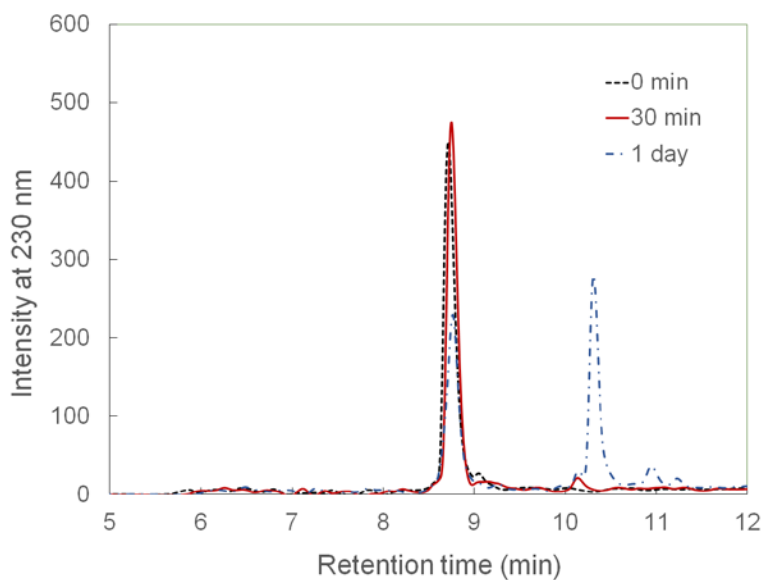

Figure S56. HPLC chromatogram of reaction mixture of **BSH** and **Cl-3H** after 0 and 30 min, and 1 day. The mobile phase consisted of 0.1% TFA aq. (solvent A) and acetonitrile (solvent B) at a flow rate of 1.0 mL/min and was used as a linear gradient from 0% to 100% of solvent B for 20 min. The peak was detected by measuring absorption at 230 nm.

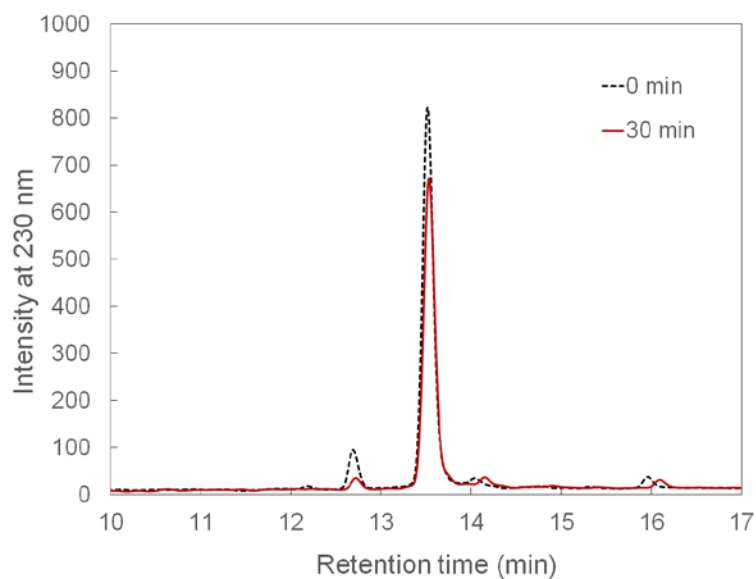

Figure S57. HPLC chromatogram of reaction mixture of **BSH** and **Cl-3I** after 0 and 30 min. The mobile phase consisted of 0.1% TFA aq. (solvent A) and acetonitrile (solvent B) at a flow rate of 1.0 mL/min and was used as a linear gradient from 0% to 100% of solvent B for 20 min. The peak was detected by measuring absorption at 230 nm.

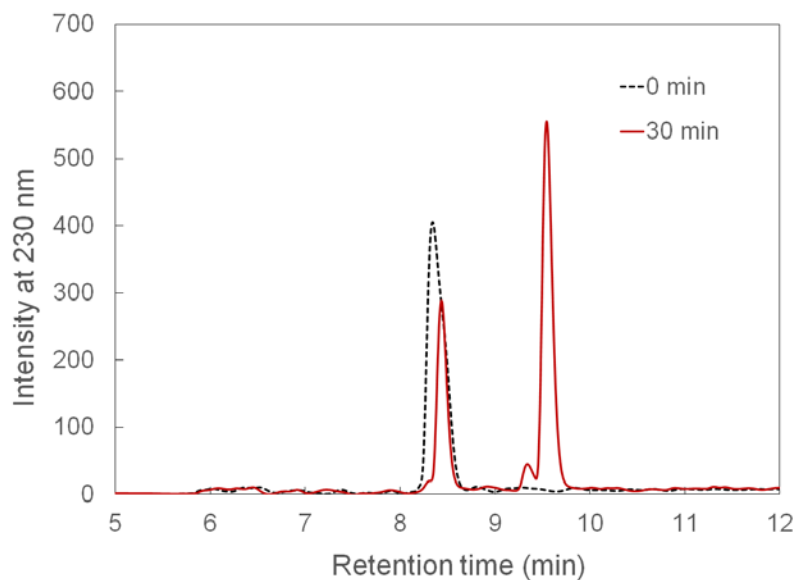

Figure S58. HPLC chromatogram of reaction mixture of **BSH** and **Cl-3K** after 0 and 30 min. The mobile phase consisted of 0.1% TFA aq. (solvent A) and acetonitrile (solvent B) at a flow rate of 1.0 mL/min and was used as a linear gradient from 0% to 100% of solvent B for 20 min. The peak was detected by measuring absorption at 230 nm.

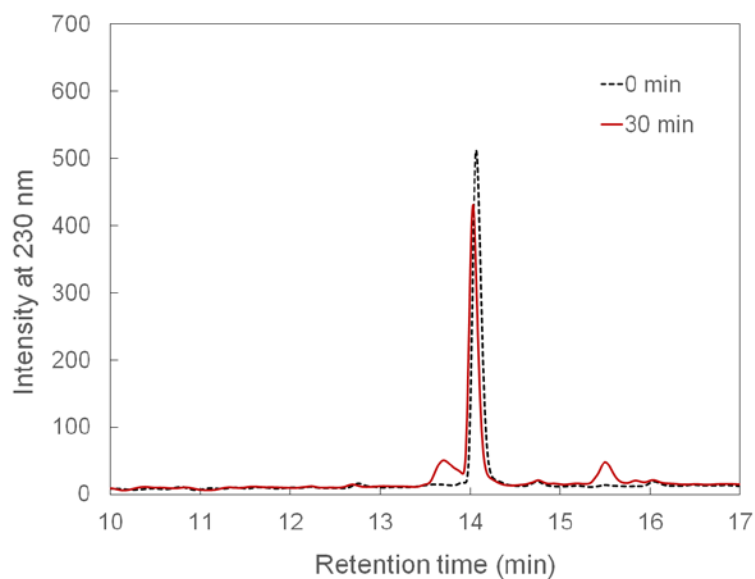

Figure S59. HPLC chromatogram of reaction mixture of **BSH** and **Cl-3L** after 0 and 30 min. The mobile phase consisted of 0.1% TFA aq. (solvent A) and acetonitrile (solvent B) at a flow rate of 1.0 mL/min and was used as a linear gradient from 0% to 100% of solvent B for 20 min. The peak was detected by measuring absorption at 230 nm.

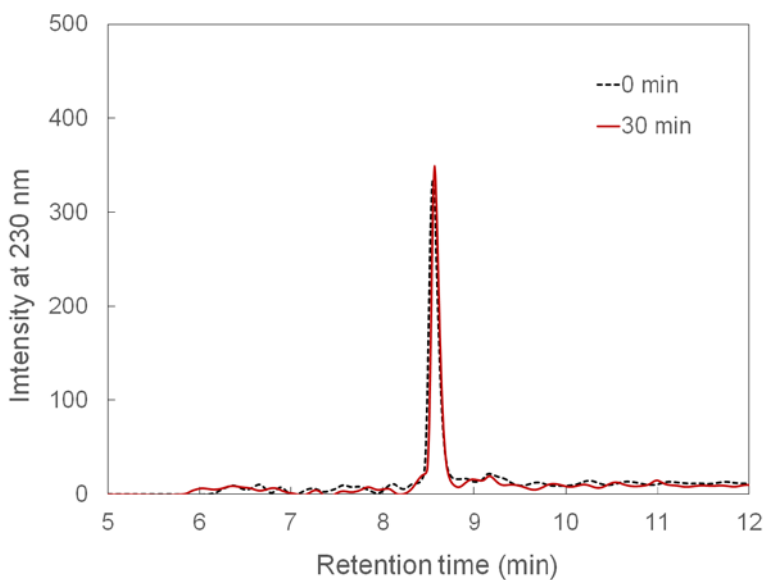

Figure S60. HPLC chromatogram of reaction mixture of **BSH** and **Cl-3N** after 0 and 30 min. The mobile phase consisted of 0.1% TFA aq. (solvent A) and acetonitrile (solvent B) at a flow rate of 1.0 mL/min and was used as a linear gradient from 0% to 100% of solvent B for 20 min. The peak was detected by measuring absorption at 230 nm.

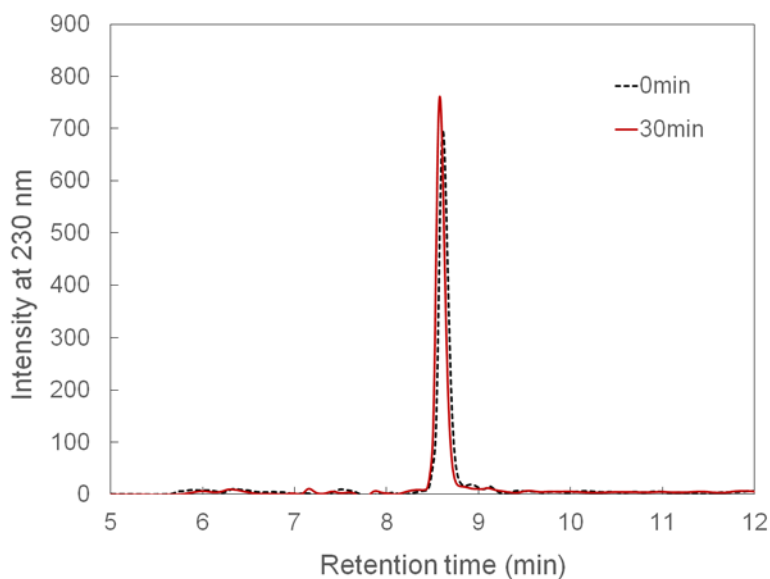

Figure S61. HPLC chromatogram of reaction mixture of **BSH** and **Cl-3Q** after 0 and 30 min. The mobile phase consisted of 0.1% TFA aq. (solvent A) and acetonitrile (solvent B) at a flow rate of 1.0 mL/min and was used as a linear gradient from 0% to 100% of solvent B for 20 min. The peak was detected by measuring absorption at 230 nm.

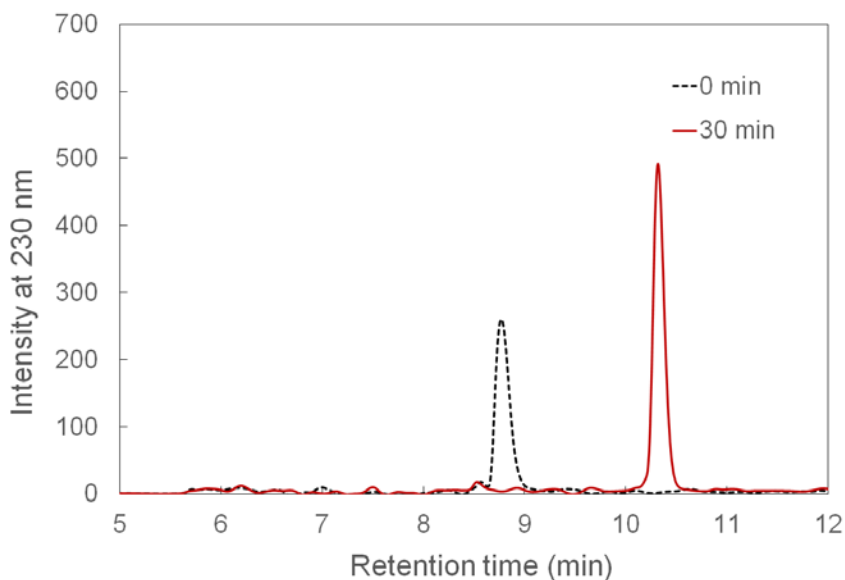

Figure S62. HPLC chromatogram of reaction mixture of **BSH** and **Cl-3R** after 0 and 30 min. The mobile phase consisted of 0.1% TFA aq. (solvent A) and acetonitrile (solvent B) at a flow rate of 1.0 mL/min and was used as a linear gradient from 0% to 100% of solvent B for 20 min. The peak was detected by measuring absorption at 230 nm.



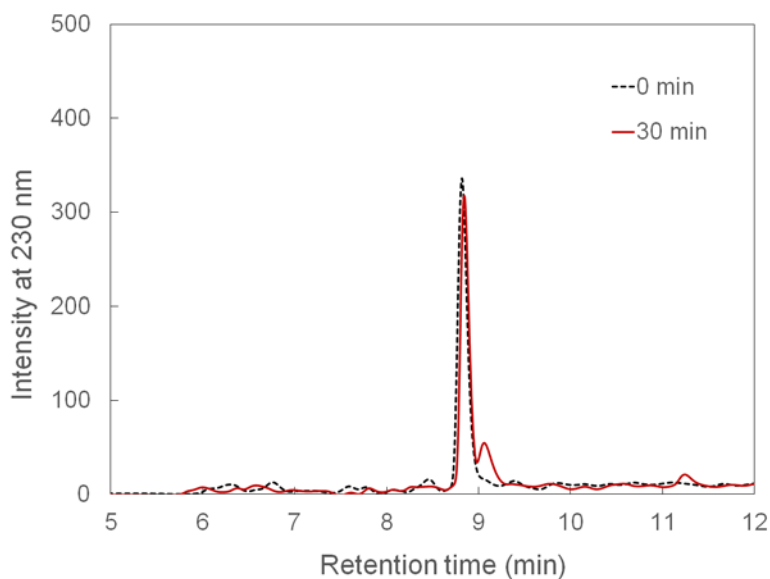

Figure S63. HPLC chromatogram of reaction mixture of **BSH** and **Cl-3S** after 0 and 30 min. The mobile phase consisted of 0.1% TFA aq. (solvent A) and acetonitrile (solvent B) at a flow rate of 1.0 mL/min and was used as a linear gradient from 0% to 100% of solvent B for 20 min. The peak was detected by measuring absorption at 230 nm.

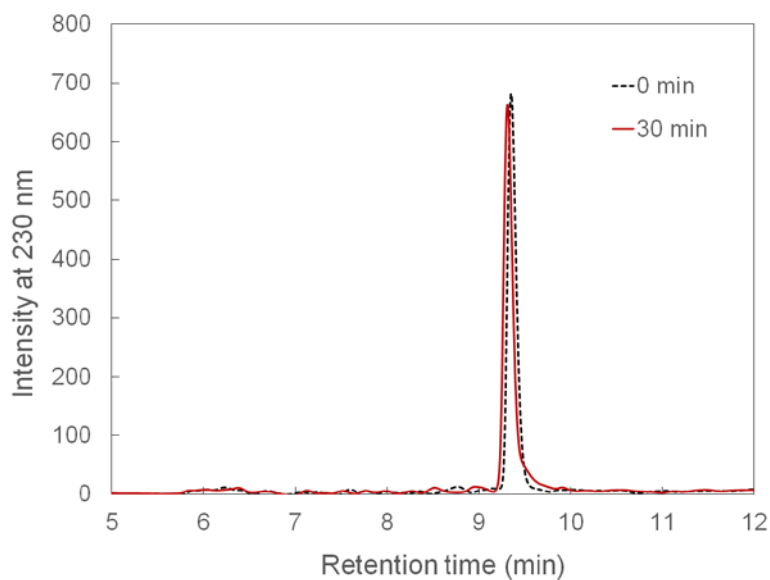

Figure S64. HPLC chromatogram of reaction mixture of **BSH** and **Cl-3T** after 0 and 30 min. The mobile phase consisted of 0.1% TFA aq. (solvent A) and acetonitrile (solvent B) at a flow rate of 1.0 mL/min and was used as a linear gradient from 0% to 100% of solvent B for 20 min. The peak was detected by measuring absorption at 230 nm.

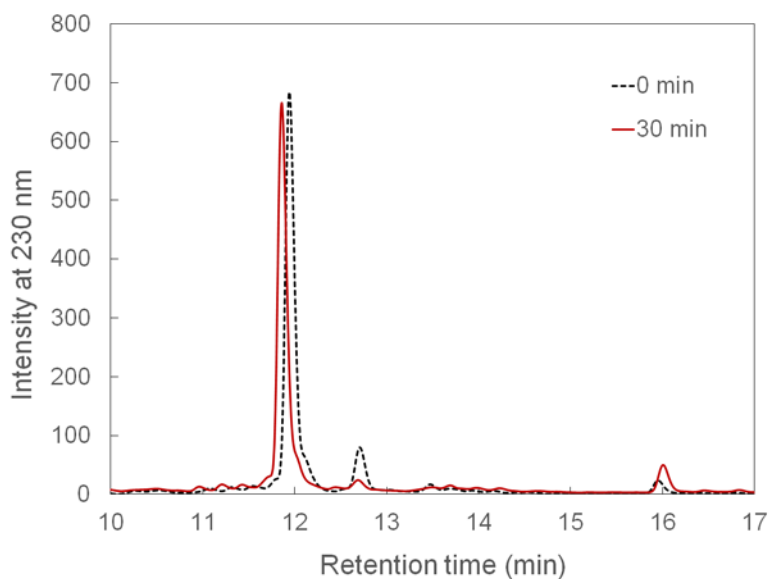

Figure S65. HPLC chromatogram of reaction mixture of **BSH** and **Cl-3V** after 0 and 30 min. The mobile phase consisted of 0.1% TFA aq. (solvent A) and acetonitrile (solvent B) at a flow rate of 1.0 mL/min and was used as a linear gradient from 0% to 100% of solvent B for 20 min. The peak was detected by measuring absorption at 230 nm.

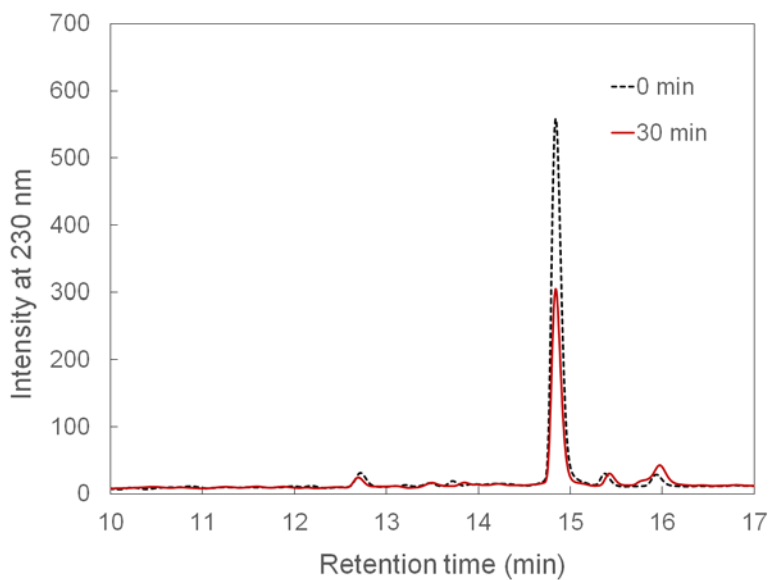

Figure S66. HPLC chromatogram of reaction mixture of **BSH** and **Cl-3W** after 0 and 30 min. The mobile phase consisted of 0.1% TFA aq. (solvent A) and acetonitrile (solvent B) at a flow rate of 1.0 mL/min and was used as a linear gradient from 0% to 100% of solvent B for 20 min. The peak was detected by measuring absorption at 230 nm.

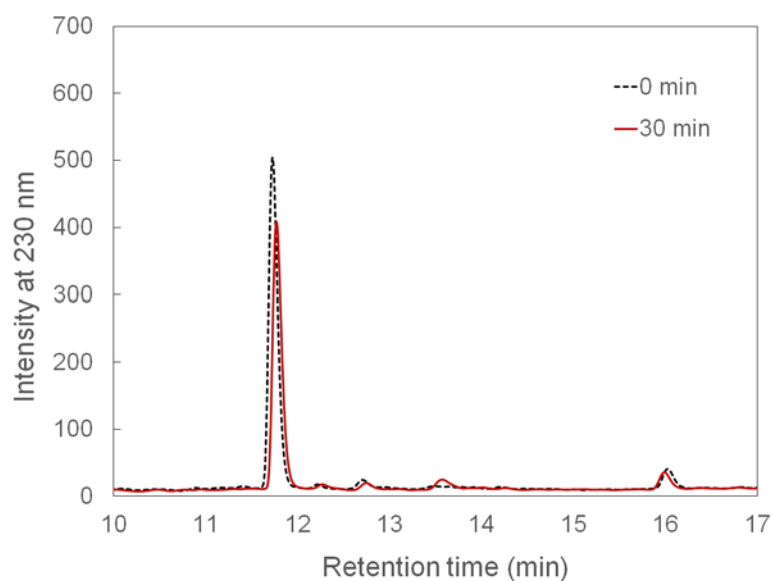

Figure S67. HPLC chromatogram of reaction mixture of **BSH** and **Cl-3Y** after 0 and 30 min. The mobile phase consisted of 0.1% TFA aq. (solvent A) and acetonitrile (solvent B) at a flow rate of 1.0 mL/min and was used as a linear gradient from 0% to 100% of solvent B for 20 min. The peak was detected by measuring absorption at 230 nm.

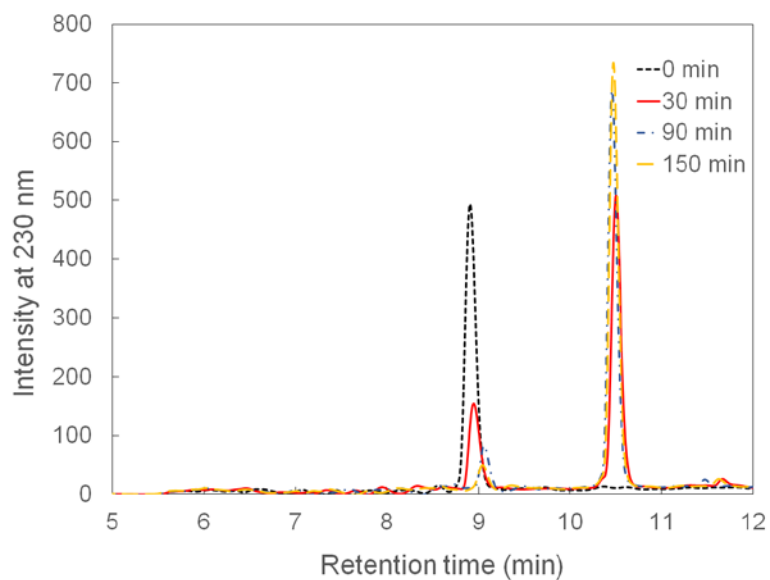

Figure S68. HPLC chromatogram of reaction mixture of **BSH** and **Cl-2R** after 0, 30, 90 and 150 min. The mobile phase consisted of 0.1% TFA aq. (solvent A) and acetonitrile (solvent B) at a flow rate of 1.0 mL/min and was used as a linear gradient from 0% to 100% of solvent B for 20 min. The peak was detected by measuring absorption at 230 nm.

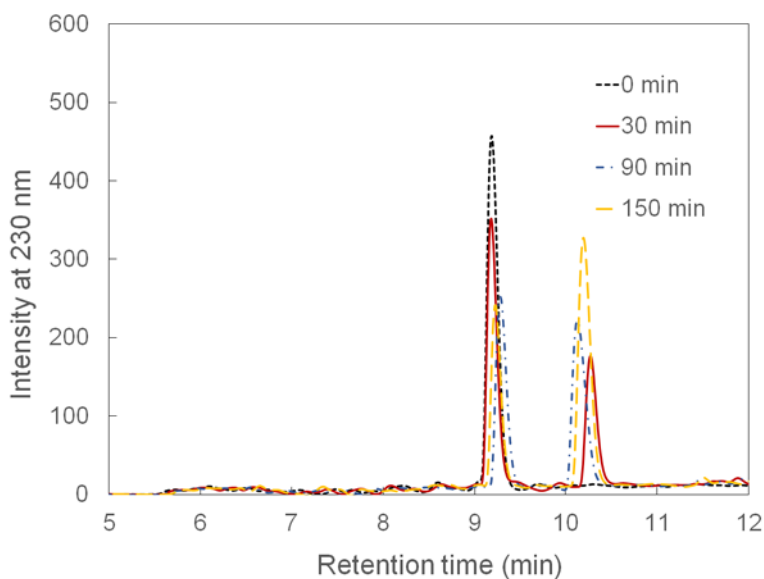

Figure S69. HPLC chromatogram of reaction mixture of **BSH** and **Cl-1R** after 0, 30, 90 and 150 min. The mobile phase consisted of 0.1% TFA aq. (solvent A) and acetonitrile (solvent B) at a flow rate of 1.0 mL/min and was used as a linear gradient from 0% to 100% of solvent B for 20 min. The peak was detected by measuring absorption at 230 nm.

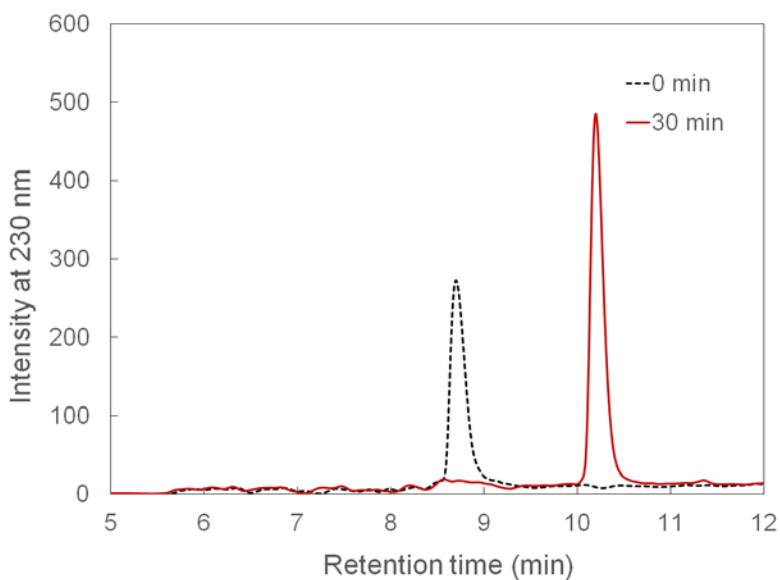

Figure S70. HPLC chromatogram of reaction mixture of **BSH** and **Cl-C1-3R** after 0 and 30 min. The mobile phase consisted of 0.1% TFA aq. (solvent A) and acetonitrile (solvent B) at a flow rate of 1.0 mL/min and was used as a linear gradient from 0% to 100% of solvent B for 20 min. The peak was detected by measuring absorption at 230 nm.

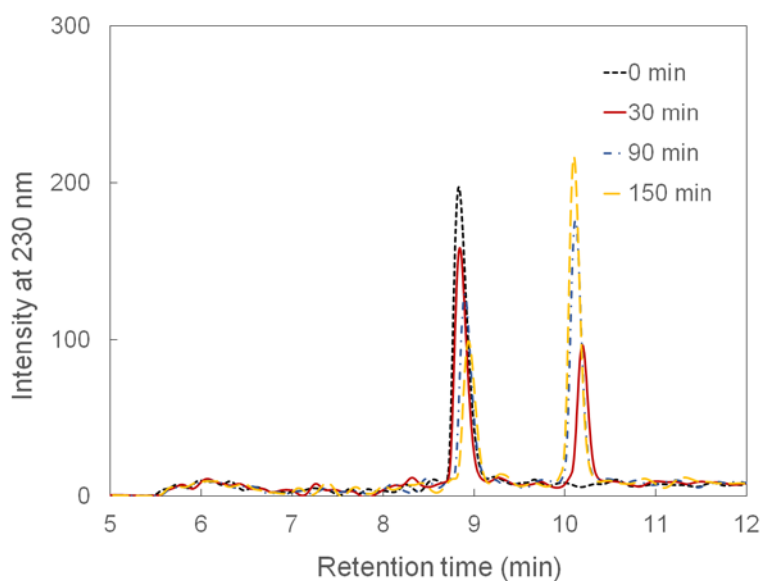

Figure S71. HPLC chromatogram of reaction mixture of **BSH** and **Cl-C2-3R** after 0, 30, 90 and 150 min. The mobile phase consisted of 0.1% TFA aq. (solvent A) and acetonitrile (solvent B) at a flow rate of 1.0 mL/min and was used as a linear gradient from 0% to 100% of solvent B for 20 min. The peak was detected by measuring absorption at 230 nm.

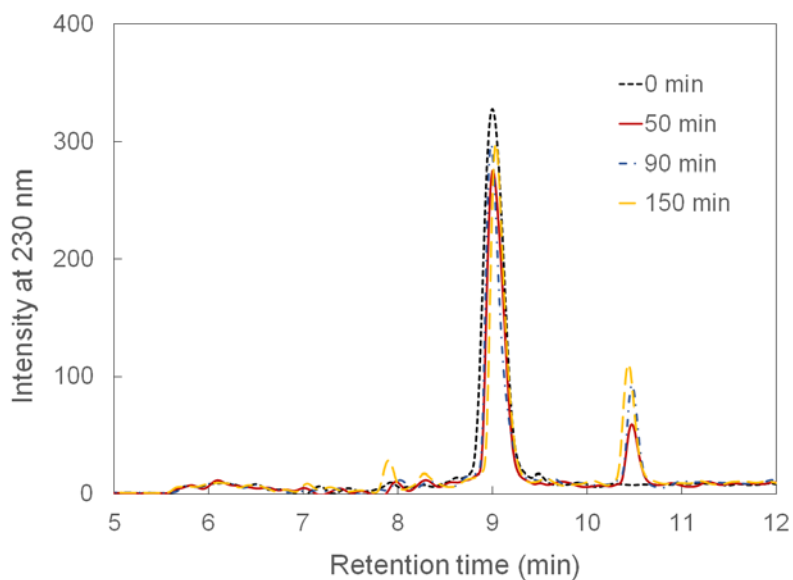

Figure S72. HPLC chromatogram of reaction mixture of **BSH** and **Cl-C4-3R** after 0, 30, 90 and 150 min. The mobile phase consisted of 0.1% TFA aq. (solvent A) and acetonitrile (solvent B) at a flow rate of 1.0 mL/min and was used as a linear gradient from 0% to 100% of solvent B for 20 min. The peak was detected by measuring absorption at 230 nm.

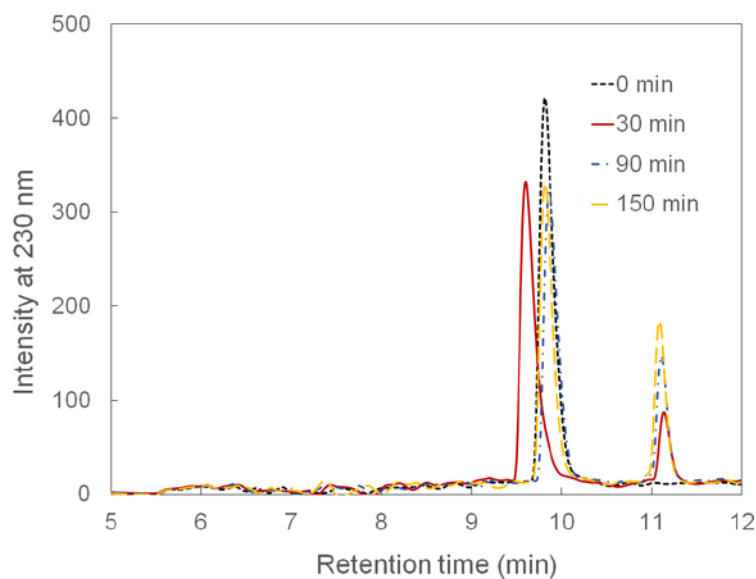

Figure S73. HPLC chromatogram of reaction mixture of **BSH** and **Cl-C7-3R** after 0, 30, 90 and 150 min. The mobile phase consisted of 0.1% TFA aq. (solvent A) and acetonitrile (solvent B) at a flow rate of 1.0 mL/min and was used as a linear gradient from 0% to 100% of solvent B for 20 min. The peak was detected by measuring absorption at 230 nm.

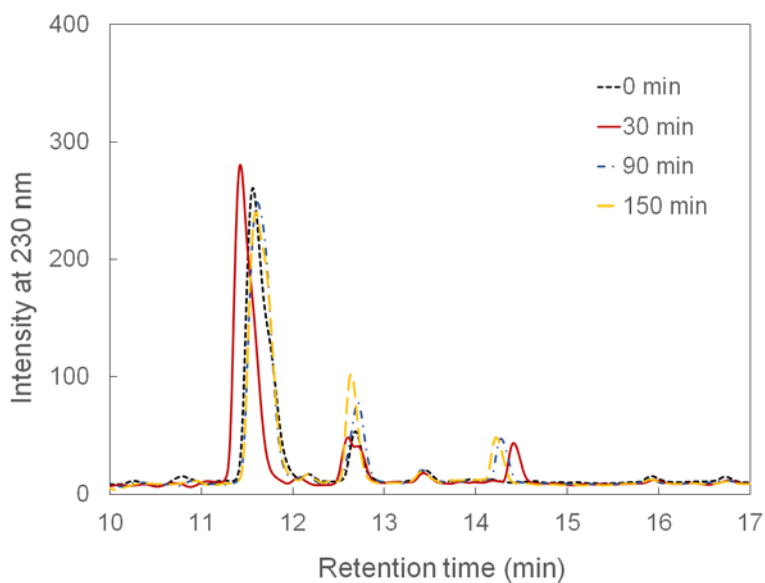

Figure S74. HPLC chromatogram of reaction mixture of **BSH** and **Cl-C11-3R** after 0, 30, 90 and 150 min. The mobile phase consisted of 0.1% TFA aq. (solvent A) and acetonitrile (solvent B) at a flow rate of 1.0 mL/min and was used as a linear gradient from 0% to 100% of solvent B for 20 min. The peak was detected by measuring absorption at 230 nm.

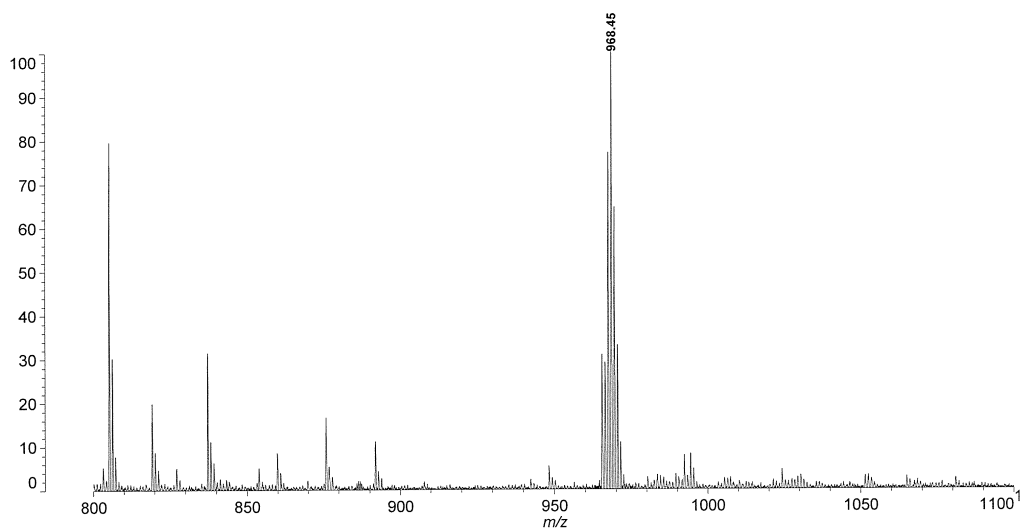

Figure S75. MALDI-TOF mass spectrum of **BS-3H**.  $\alpha$ -CHCA was used as a matrix. **BS-3H**: calcd.  $[M+H]^+ = 968.62$  and obsd.  $[M+H]^+ = 968.45$ .

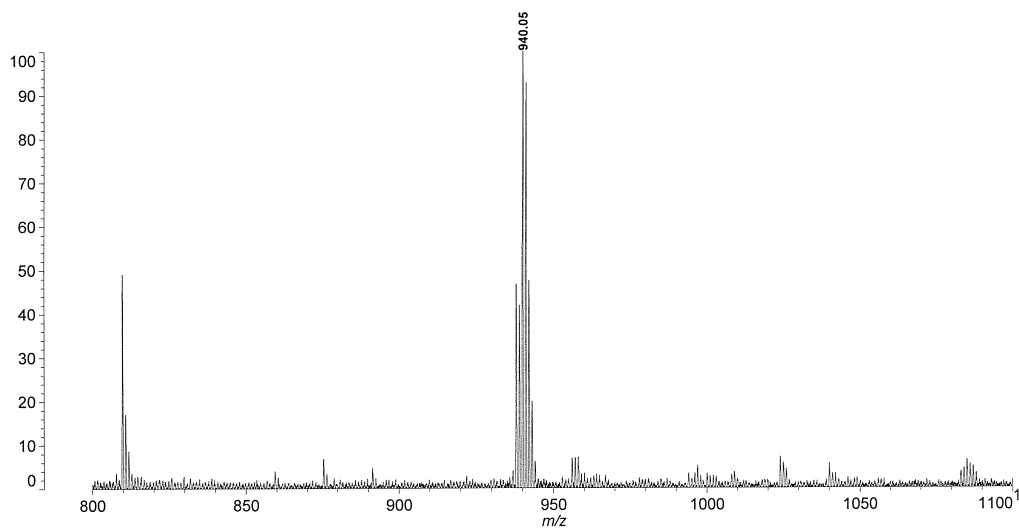

Figure S76. MALDI-TOF mass spectrum of **BS-3K**.  $\alpha$ -CHCA was used as a matrix. **BS-3K**: calcd.  $[M+H]^+ = 941.73$  and obsd.  $[M+H]^+ = 940.05$ .

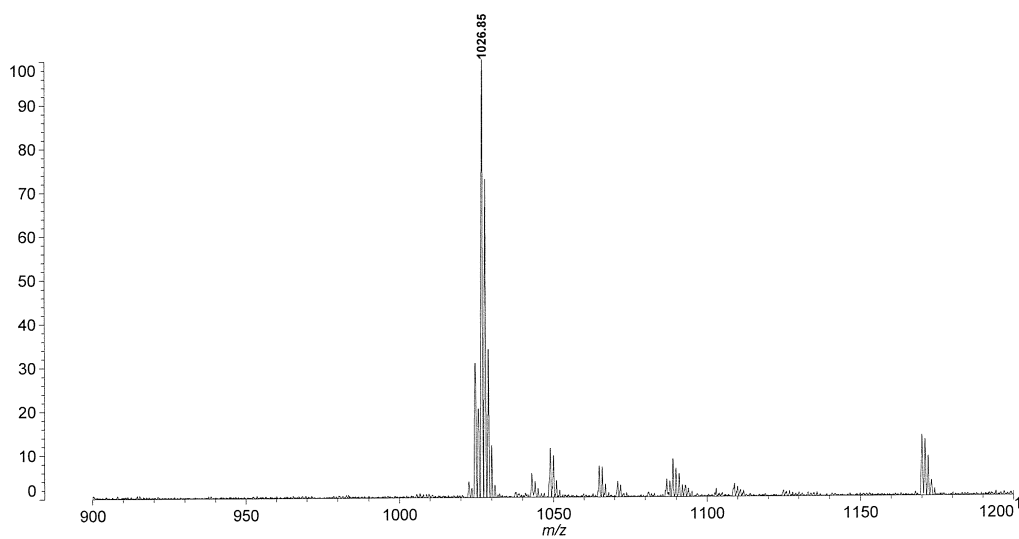

Figure S77. MALDI-TOF mass spectrum of **BS-3R**.  $\alpha$ -CHCA was used as a matrix. **BS-3R**: calcd.  $[M+H]^+ = 1026.76$  and obsd.  $[M+H]^+ = 1026.85$ .

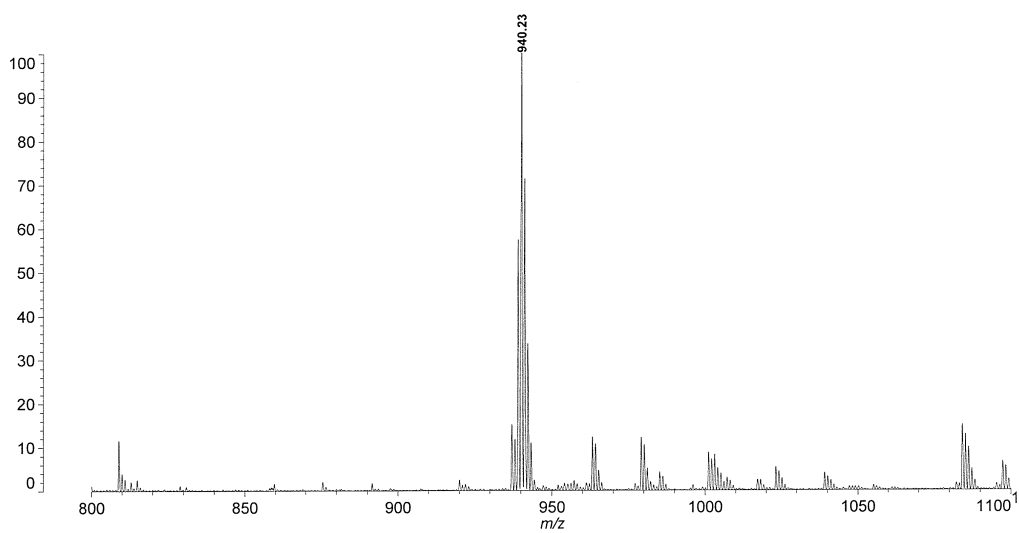

Figure S78. MALDI-TOF mass spectrum of **BS-2R**.  $\alpha$ -CHCA was used as a matrix. **BS-2R**: calcd.  $[M+H]^+ = 940.69$  and obsd.  $[M+H]^+ = 940.23$ .



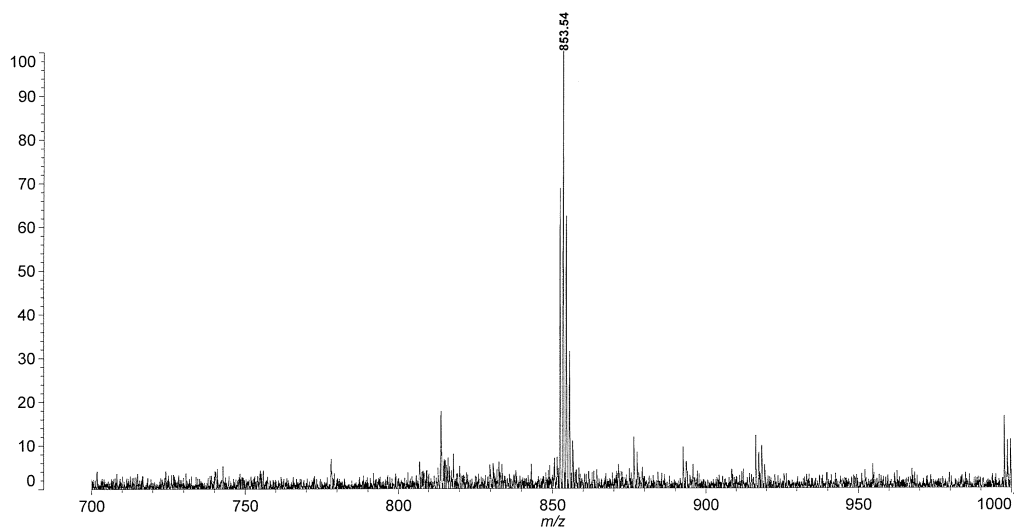

Figure S79. MALDI-TOF mass spectrum of **BS-1R**.  $\alpha$ -CHCA was used as a matrix. **BS-1R**: calcd.  $[M+H]^+ = 855.62$  and obsd.  $[M+H]^+ = 853.54$ . The spectrum was obtained in negative ion mode.

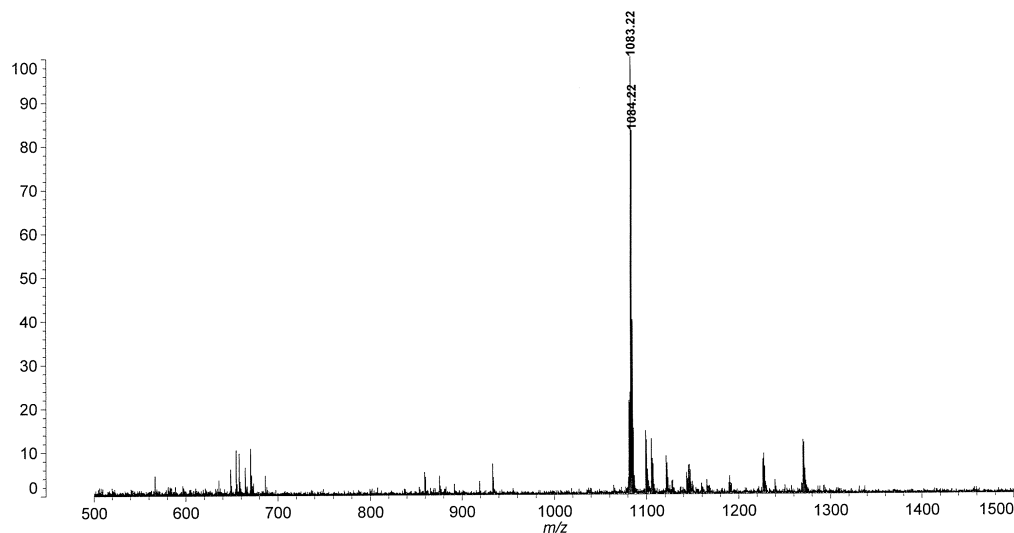

Figure S80. MALDI-TOF mass spectrum of **BS-C1-3R**.  $\alpha$ -CHCA was used as a matrix. **BS-C1-3R**: calcd.  $[M+H]^+ = 1082.77$  and obsd.  $[M+H]^+ = 1083.22$ .

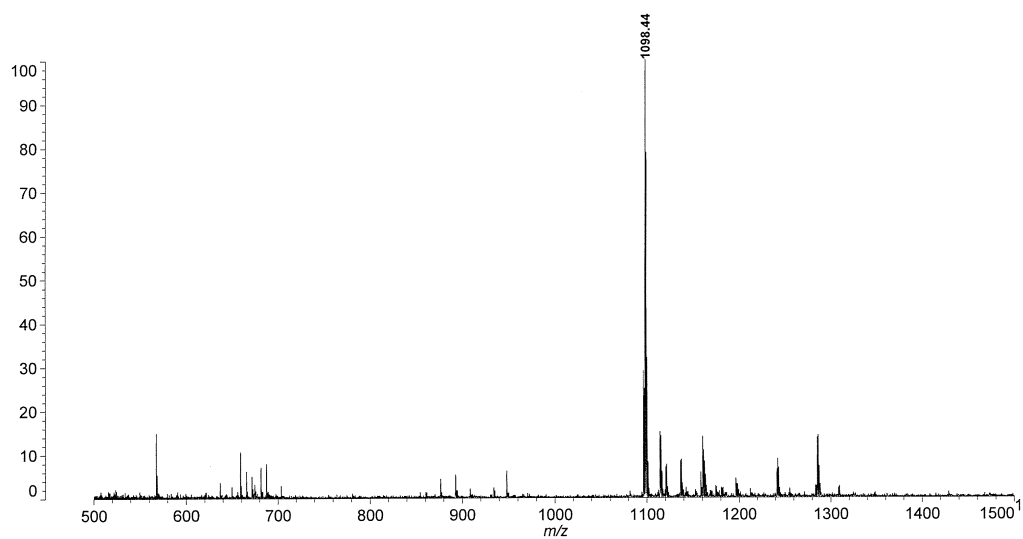

Figure S81. MALDI-TOF mass spectrum of **BS-C2-3R**.  $\alpha$ -CHCA was used as a matrix. **BS-C2-3R**: calcd.  $[M+H]^+ = 1096.79$  and obsd.  $[M+H]^+ = 1098.44$ .

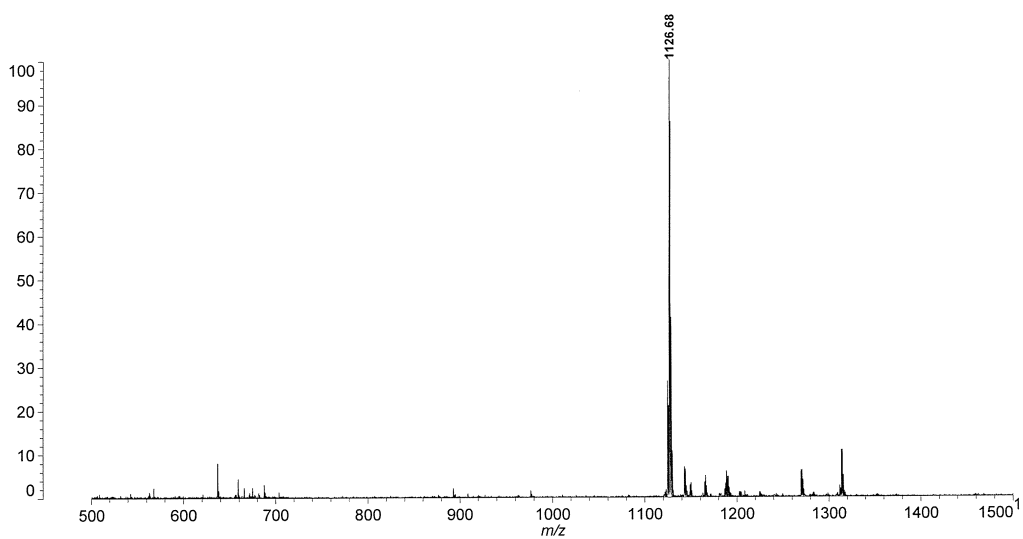

Figure S82. MALDI-TOF mass spectrum of **BS-C4-3R**.  $\alpha$ -CHCA was used as a matrix. **BS-C4-3R**: calcd.  $[M+H]^+ = 1124.82$  and obsd.  $[M+H]^+ = 1126.68$ .

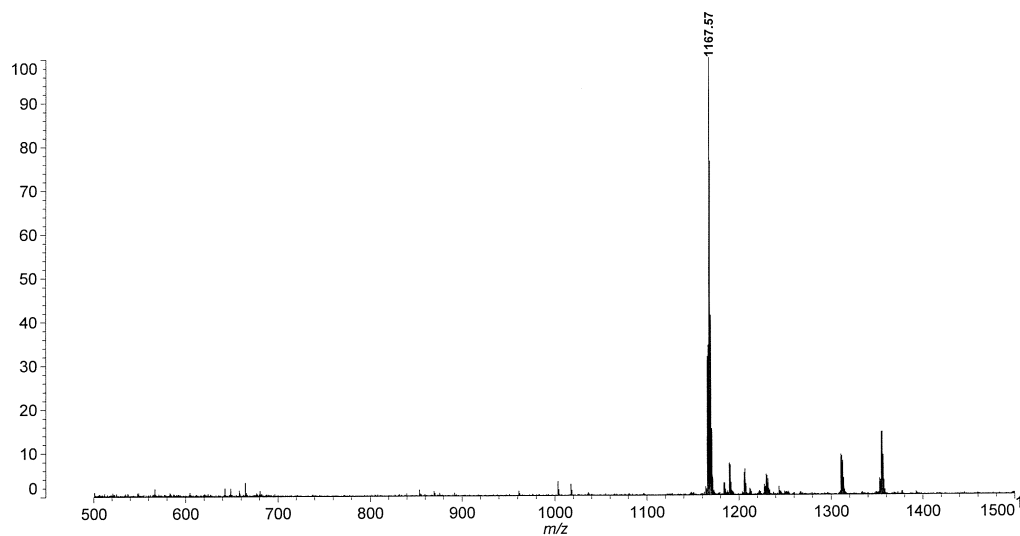

Figure S83. MALDI-TOF mass spectrum of **BS-C7-3R**.  $\alpha$ -CHCA was used as a matrix. **BS-C7-3R**: calcd.  $[M+H]^+ = 1166.87$  and obsd.  $[M+H]^+ = 1167.57$ .

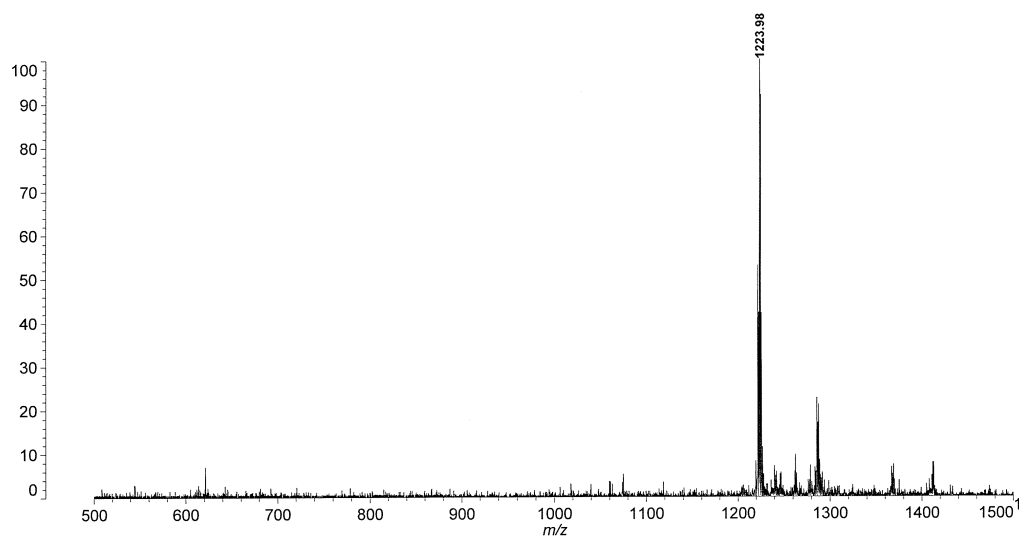

Figure S84. MALDI-TOF mass spectrum of **BS-C11-3R**.  $\alpha$ -CHCA was used as a matrix. **BS-C11-3R**: calcd.  $[M+H]^+ = 1122.93$  and obsd.  $[M+H]^+ = 1223.98$ .

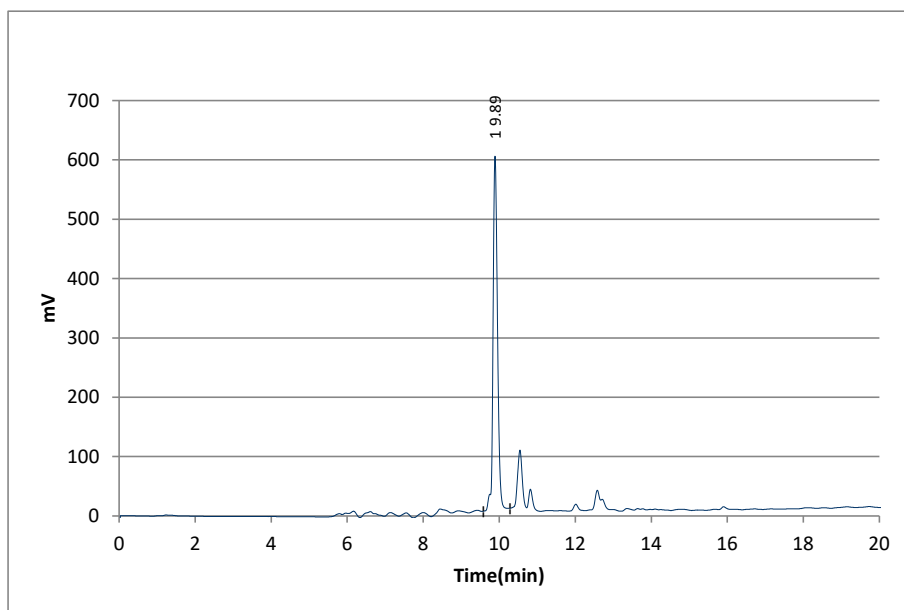

Figure S85. HPLC chromatogram of **BS-3H**. The mobile phase consisted of 0.1% TFA aq. (solvent A) and acetonitrile (solvent B) at a flow rate of 1.0 mL/min and was used as a linear gradient from 0% to 100% of solvent B for 20 min. The peak was detected by measuring absorption at 230 nm.

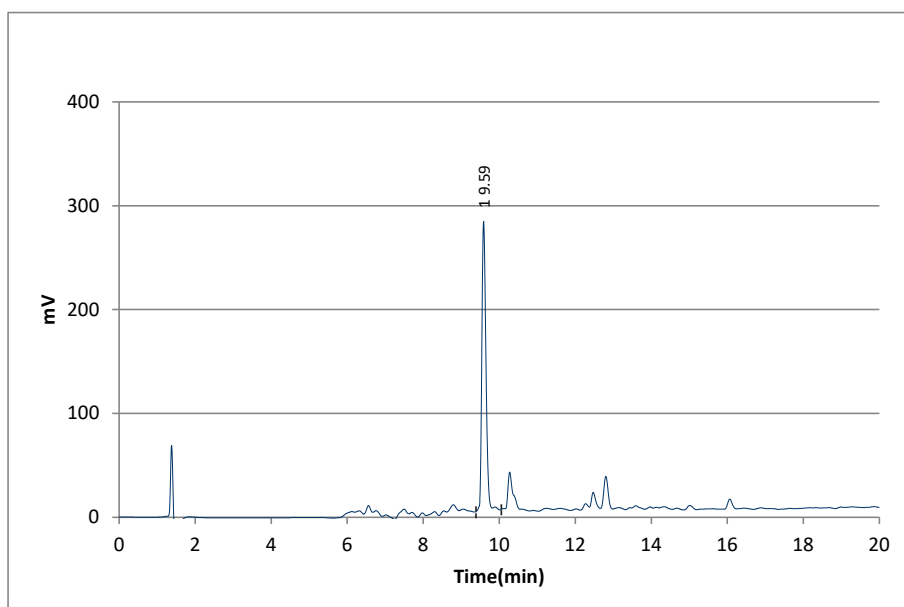

Figure S86. HPLC chromatogram of **BS-3K**. The mobile phase consisted of 0.1% TFA aq. (solvent A) and acetonitrile (solvent B) at a flow rate of 1.0 mL/min and was used as a linear gradient from 0% to 100% of solvent B for 20 min. The peak was detected by measuring absorption at 230 nm.

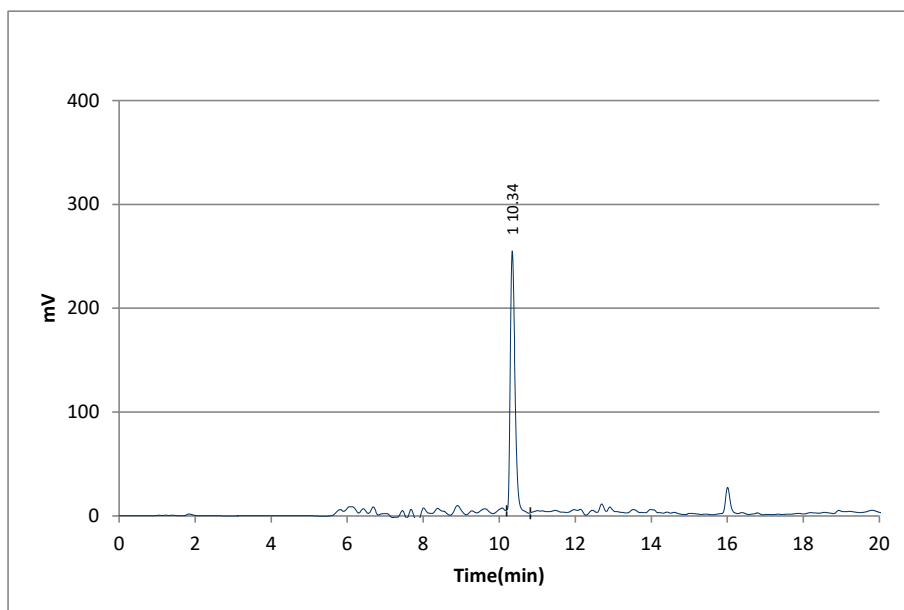

Figure S87. HPLC chromatogram of **BS-3R**. The mobile phase consisted of 0.1% TFA aq. (solvent A) and acetonitrile (solvent B) at a flow rate of 1.0 mL/min and was used as a linear gradient from 0% to 100% of solvent B for 20 min. The peak was detected by measuring absorption at 230 nm.

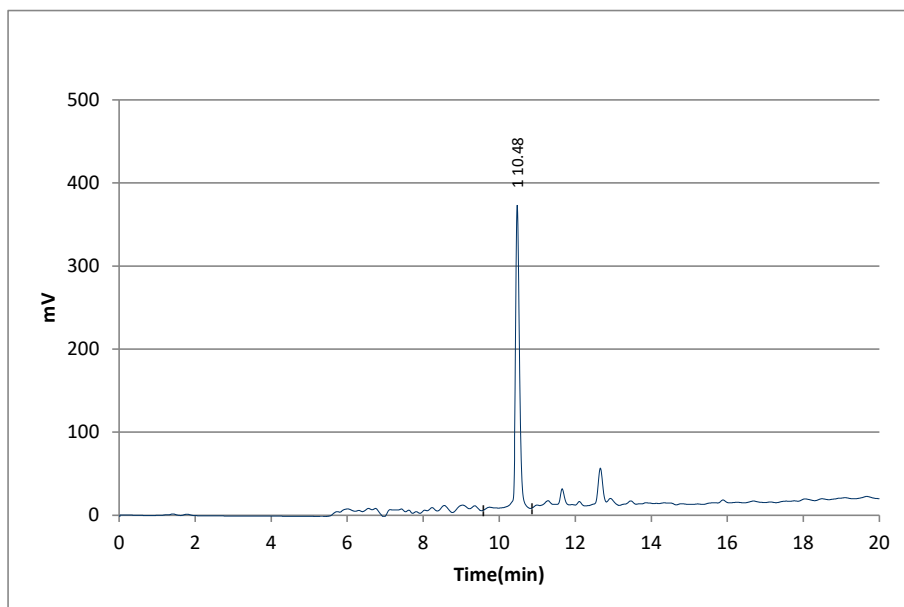

Figure S88. HPLC chromatogram of **BS-2R**. The mobile phase consisted of 0.1% TFA aq. (solvent A) and acetonitrile (solvent B) at a flow rate of 1.0 mL/min and was used as a linear gradient from 0% to 100% of solvent B for 20 min. The peak was detected by measuring absorption at 230 nm.

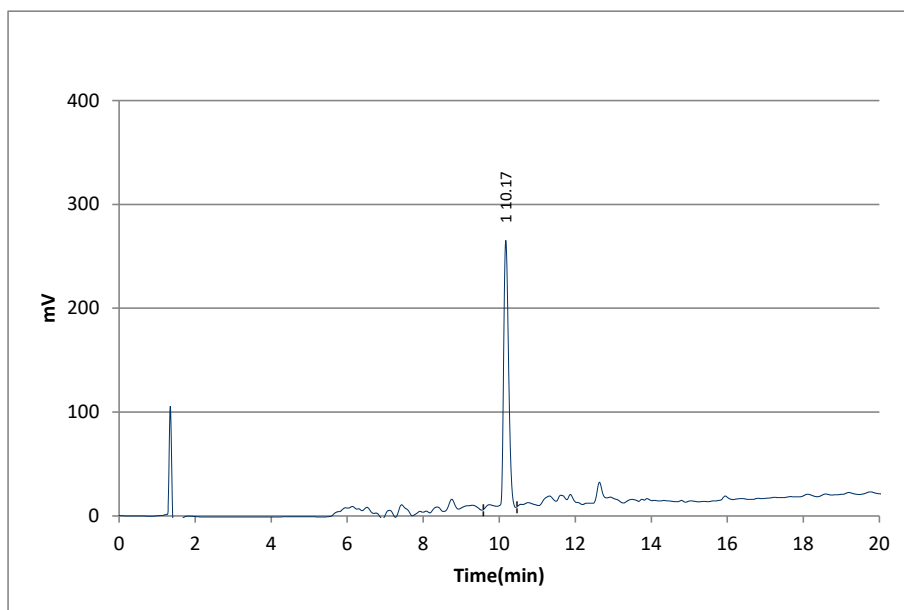

Figure S89. HPLC chromatogram of **BS-1R**. The mobile phase consisted of 0.1% TFA aq. (solvent A) and acetonitrile (solvent B) at a flow rate of 1.0 mL/min and was used as a linear gradient from 0% to 100% of solvent B for 20 min. The peak was detected by measuring absorption at 230 nm.

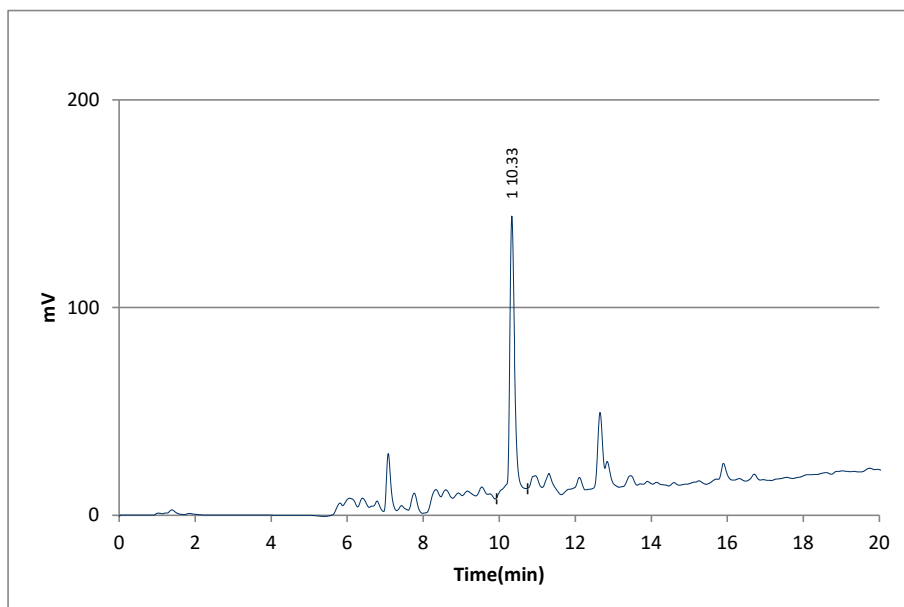

Figure S90. HPLC chromatogram of **BS-C1-3R**. The mobile phase consisted of 0.1% TFA aq. (solvent A) and acetonitrile (solvent B) at a flow rate of 1.0 mL/min and was used as a linear gradient from 0% to 100% of solvent B for 20 min. The peak was detected by measuring absorption at 230 nm.

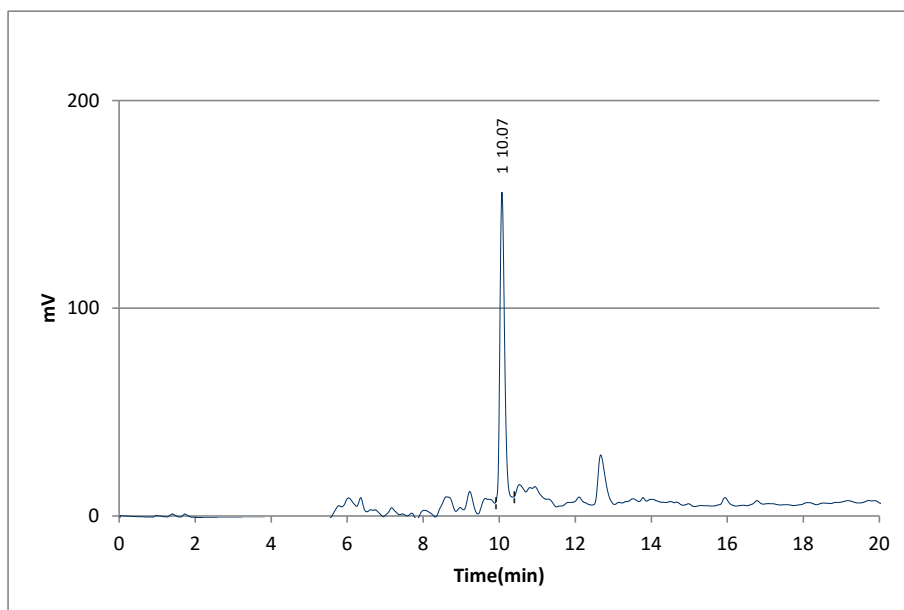

Figure S91. HPLC chromatogram of **BS-C2-3R**. The mobile phase consisted of 0.1% TFA aq. (solvent A) and acetonitrile (solvent B) at a flow rate of 1.0 mL/min and was used as a linear gradient from 0% to 100% of solvent B for 20 min. The peak was detected by measuring absorption at 230 nm.

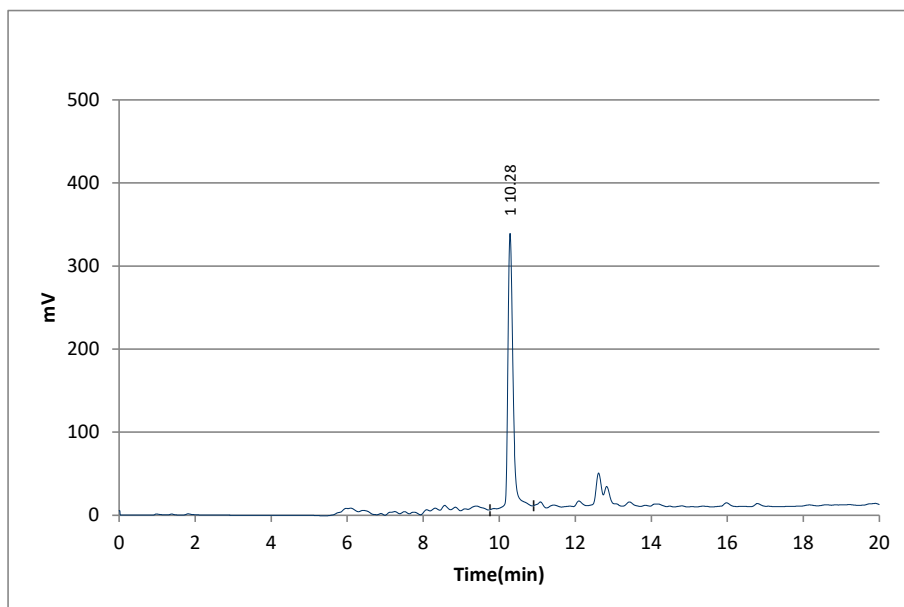

Figure S92. HPLC chromatogram of **BS-C4-3R**. The mobile phase consisted of 0.1% TFA aq. (solvent A) and acetonitrile (solvent B) at a flow rate of 1.0 mL/min and was used as a linear gradient from 0% to 100% of solvent B for 20 min. The peak was detected by measuring absorption at 230 nm.

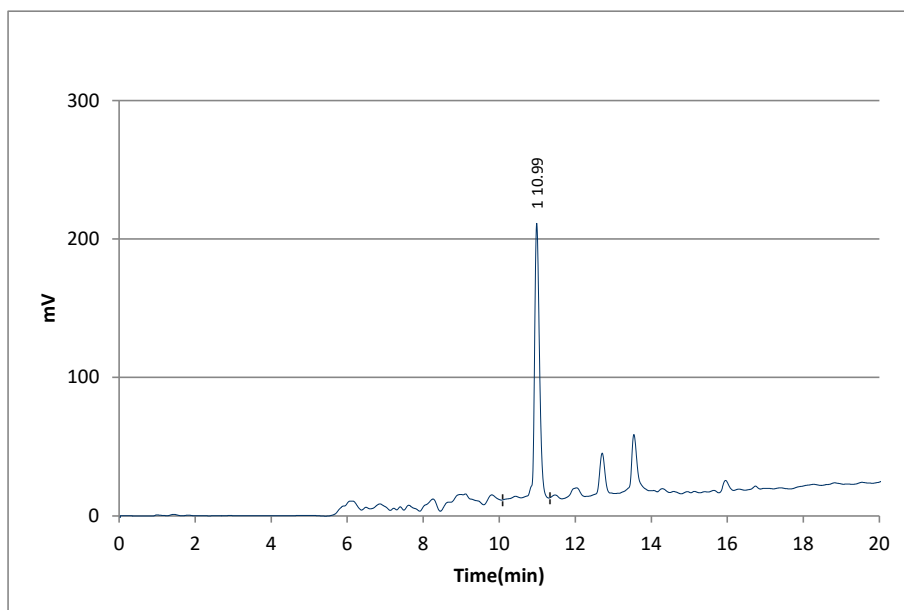

Figure S93. HPLC chromatogram of **BS-C7-3R**. The mobile phase consisted of 0.1% TFA aq. (solvent A) and acetonitrile (solvent B) at a flow rate of 1.0 mL/min and was used as a linear gradient from 0% to 100% of solvent B for 20 min. The peak was detected by measuring absorption at 230 nm.

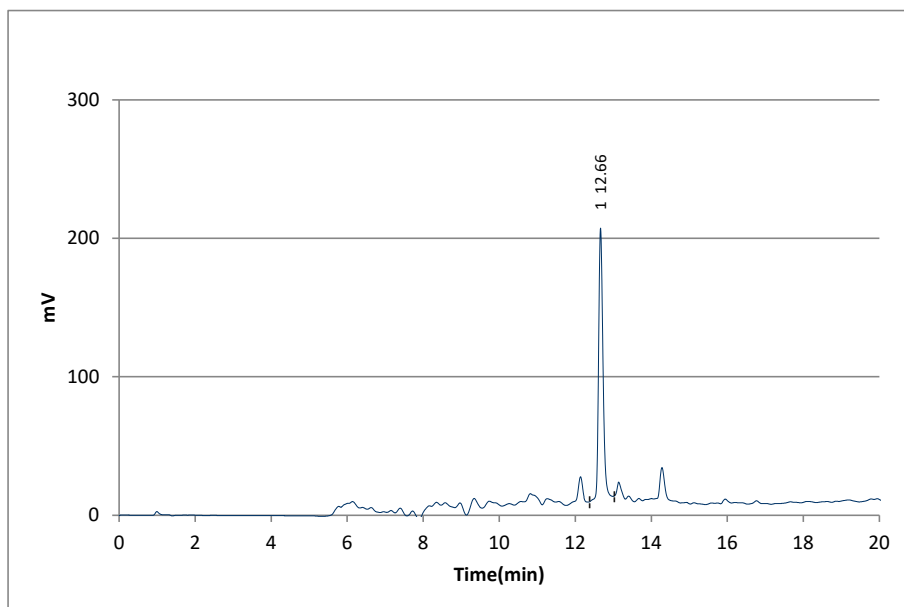

Figure S94. HPLC chromatogram of **BS-C11-3R**. The mobile phase consisted of 0.1% TFA aq. (solvent A) and acetonitrile (solvent B) at a flow rate of 1.0 mL/min and was used as a linear gradient from 0% to 100% of solvent B for 20 min. The peak was detected by measuring absorption at 230 nm.



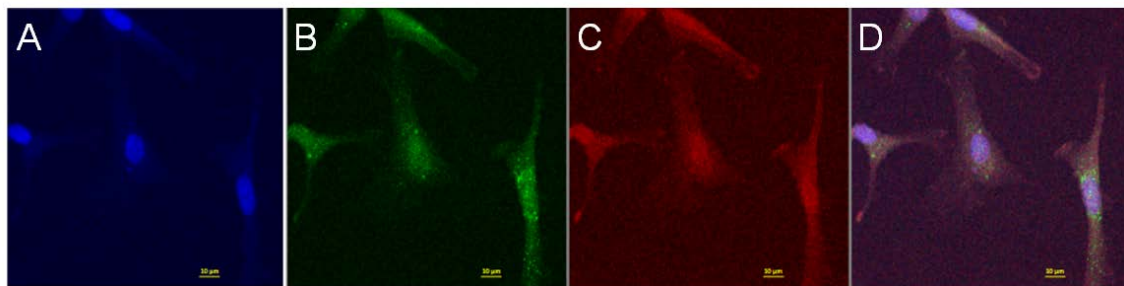

Figure S95. Typical confocal laser scanning microscope (CLSM) images of U87ΔEGFR cells after treatment with **BS-3R** for 24 h. Fluorescence signals were observed using Olympus FluoView. The final concentration of **BS-3R** was 10  $\mu$ M. Panel A shows nucleus displayed as blue signals. Panel B shows BSH displayed as green signals by incubating with anti-BSH mouse mAb [6]. Panel C shows F-actin displayed as red signals. Panel D is the merging of the three images. The scale bar is 10.0  $\mu$ m.
